## **BOLD and EEG Signal Variability at Rest Differently Relate to Aging in the Human Brain**

D. Kumral<sup>1,2</sup>, F. Şansal<sup>3,1</sup>, E. Cesnaite<sup>1</sup>, K. Mahjoory<sup>1,4</sup>, E. Al<sup>2,1</sup>, M. Gaebler<sup>1,2</sup>, V. V. Nikulin<sup>1,5,6</sup>, A. Villringer<sup>1,2,7,8</sup>

<sup>1</sup>Department of Neurology, Max Planck Institute for Human Cognitive and Brain Sciences, Leipzig, Germany

<sup>2</sup>MindBrainBody Institute at the Berlin School of Mind and Brain, Humboldt-Universität zu Berlin, Berlin, Germany

<sup>3</sup>International Graduate Program Medical Neurosciences, Charité-Universitätsmedizin, Berlin, Germany

<sup>4</sup>Institute for Biomagnetism and Biosignalanalysis, University of Muenster, Muenster, Germany

<sup>5</sup>Neurophysics Group, Department of Neurology, Campus Benjamin Franklin, Charité Universitätsmedizin Berlin, Berlin, Germany

<sup>6</sup>Centre for Cognition and Decision Making, National Research University Higher School of Economics, Moscow, Russian Federation

<sup>7</sup>Center for Stroke Research Berlin, Charité – Universitätsmedizin Berlin, Berlin, Germany

<sup>8</sup>Department of Cognitive Neurology, University Hospital Leipzig

**Corresponding author:** Deniz Kumral, Department of Neurology, Max Planck Institute for Human Cognitive and Brain Sciences, Stephanstrasse 1A, 04103, Leipzig, Germany.

Email: [dkumral@cbs.mpg.de](mailto:dkumral@cbs.mpg.de)

**Abbreviations:** BOLD – Blood Oxygenation Level Dependent; CBF – cerebral blood flow; CBV – cerebral blood volume; CCA – canonical correlation analysis; CMRO<sub>2</sub> – cerebral metabolic rate of oxygen; CVR – cerebrovascular reactivity; DMN – Default Mode Network; EEG – electroencephalography; EC – eyes closed; EO – eyes open; FDR – false discovery rate; FEM – finite element method; fMRI – functional Magnetic Resonance Imaging; fNIRS – functional Near-Infrared Spectroscopy; FWHM – full-width half-maximum; ICBM – International Consortium for Brain Mapping; MEG – magnetoencephalography; MNI – Montreal Neurological Institute; rho – Spearman’s rank correlation coefficient; PET – Positron-emission tomography; ROI – regions of interests; rs – resting state; SD – standard deviation; SVD – Singular Value Decomposition

## Abstract

Variability of neural activity is regarded as a crucial feature of healthy brain function, and several neuroimaging approaches have been employed to assess it noninvasively. Studies on the variability of both evoked brain response and spontaneous brain signals have shown remarkable changes with aging but it is unclear if the different measures of brain signal variability – identified with either hemodynamic or electrophysiological methods – reflect the same underlying physiology. In this study, we aimed to explore age differences of spontaneous brain signal variability with two different imaging modalities (EEG, fMRI) in healthy younger ( $25 \pm 3$  years,  $N=135$ ) and older ( $67 \pm 4$  years,  $N=54$ ) adults. Consistent with the previous studies, we found lower blood oxygenation level dependent (BOLD) variability in the older subjects as well as less signal variability in the amplitude of low-frequency oscillations (1–12 Hz), measured in source space. These age-related reductions were mostly observed in the areas that overlap with the default mode network. Moreover, age-related increases of variability in the amplitude of beta-band frequency EEG oscillations (15–25 Hz) were seen predominantly in fronto-temporal and sensorimotor brain regions. There were significant sex differences in BOLD and EEG signal variability in various brain regions, but no significant interactions between age and sex were observed. Further, both univariate and multivariate correlation analyses revealed no significant associations between these two variability measures. In summary, we show that both BOLD and EEG signal variability reflect aging-related processes but are likely to be dominated by different physiological origins, which relate differentially to age and sex.

**Keywords:** brain signal variability, resting state, BOLD, fMRI, EEG, aging, sex, default mode network

## 1. Introduction

Functional neuroimaging methods such as fMRI, PET, fNIRS, EEG, or MEG have allowed the non-invasive assessment of functional changes in the aging human brain (Cabeza, 2001; Cabeza et al., 2018). Most previous functional neuroimaging studies on aging have employed a task-based design (Grady, 2012) and in their data analysis the central tendency has typically been assumed to be the most representative value in a distribution (e.g., mean) (Speelman and McGann, 2013) or the “signal” within distributional “noise”. In recent years, also the variability of brain activation in task-dependent and task-independent measurements (as spontaneous variations of background activity) has been shown to provide relevant information about the brain’s functional state (Garrett et al., 2013b; Grady and Garrett, 2018; Nomi et al., 2017). These studies primarily measured the blood oxygen level dependent (BOLD) signal using fMRI. For example, it has been demonstrated that the variance of the task-evoked BOLD response was differentially related to aging as well as cognitive performance (Armbruster-Genc et al., 2016; Garrett et al., 2013a). Similarly, spontaneous signal variability in resting state fMRI (rsfMRI) has been associated with age (Grady and Garrett, 2018; Nomi et al., 2017), emotional state (state anxiety; Labrenz et al., 2018), and mental or neural disorders such as stroke (Kielar et al., 2016), Attention Deficit Hyperactivity Disorder (Nomi et al., 2018) or 22q11.2 deletion syndrome (Zöller et al., 2017). From these studies, it was concluded that reductions in BOLD signal variability might serve as an index for deficits in neural processing and cognitive flexibility (Grady and Garrett, 2014).

These conclusions of aforementioned studies imply that BOLD signal variability is mainly determined by *neuronal* variability. To a large extent, this is based on the premise that BOLD is related to neuronal activity: The evoked BOLD signal in task-based fMRI reflects the decrease of the deoxyhemoglobin concentration to changes in local brain activity, which is determined by vascular (blood velocity and volume: “neurovascular coupling”) and metabolic (oxygen consumption: “neurometabolic coupling”) factors (Logothetis and Wandell, 2004; Villringer and Dirnagl, 1995). The BOLD signal is therefore only an indirect measure of neural activity (Logothetis, 2008). For the variability of task-evoked BOLD signal and for spontaneous variations of the BOLD signal, in principle, the same considerations apply regarding their relationship to underlying neural processes (Murayama et al., 2010). However, since in rsfMRI there is no explicit external trigger for evoked brain activity to which time-locked averaging could be applied, the time course of rsfMRI signals is potentially more susceptible to contributions of “physiological noise”, such as cardiac and respiratory signals (Birn et al., 2008; Chang et al., 2009), but also spontaneous fluctuations of vascular tone,

which is found even in isolated arterial vessels (Failla et al., 1999; Hudetz et al., 1998; Wang et al., 2006). In the same vein, the variability of task-evoked fMRI is not necessarily reflecting only the variability of evoked neuronal activity, as it may also – at least partly – reflect the variability of the spontaneous background signal on which a constant evoked response is superimposed.

In aging, non-neuronal signal fluctuations may also introduce spurious common variance across the rsfMRI time series (Caballero-Gaudes and Reynolds, 2017), thus confounding estimates of “neural” brain signal variability. Previous evidence suggests that the relationship between neuronal activity and the vascular response is attenuated with age – and so is, as a consequence, the BOLD signal (for review see D’Esposito et al., 2003). For instance, aging has been associated with altered cerebrovascular ultrastructure, reduced elasticity of vessels, and atherosclerosis (Farkas and Luiten, 2001) but also with a decrease in resting cerebral blood flow (CBF) (Ances et al., 2009; Martin et al., 1991), cerebral metabolic rate of oxygen consumption (CMRO<sub>2</sub>) (Aanerud et al., 2012), and cerebrovascular reactivity (CVR) (Liu et al., 2013). Taken together, age-related changes in BOLD signal or BOLD signal variability are related to a mixture of alterations in non-neuronal spontaneous fluctuations of vascular signals, neural activity, neurovascular coupling, and/or neurometabolic coupling (D’Esposito et al., 2003; Geerligs et al., 2017; Tsvetanov et al., 2015).

While BOLD fMRI signal and specifically variance measures based on fMRI are only partially and indirectly related to neural activity (Liu, 2013; Logothetis, 2008), electrophysiological methods such as EEG can provide a more direct assessment of neural activity with a higher temporal but poorer spatial resolution (Cohen, 2017). EEG measures neuronal currents resulting from the synchronization of dendritic postsynaptic potentials across the neural population; the cerebral EEG rhythms thereby reflect the underlying brain neural network activity (Steriade, 2006). Resting state (rs)EEG is characterized by spontaneous oscillations (“brain rhythms”) at different frequencies. Previously, the mean amplitude of low-frequency bands (e.g., delta and/or theta, 1-7 Hz) has been shown to correlate negatively with age (Vlahou et al., 2015), while higher-frequency bands (e.g., beta, 15-25 Hz) show the reverse pattern (Rossiter et al., 2014). However, less is known about the within-subject variability of EEG measures and their association with aging. Several studies have addressed the variability in the spectral amplitudes of different frequency bands using variance (Hawkes and Prescott, 1973; Oken and Chiappa, 1988), coefficient of variation (Burgess and Gruzelier, 1993; Maltez et al., 2004), and complexity (Fernández et al., 2012; Sleimen-Malkoun et al., 2015). For instance, reductions of the complexity in rsEEG signal



have been found not only in healthy aging (Yang et al., 2013; Zappasodi et al., 2015) but also in age-related pathologies such as mild cognitive impairment (McBride et al., 2014) and Alzheimer's disease (Smits et al., 2016). Accordingly, it has been suggested that irregular (e.g., variable) systems indicate a normal and healthy state (more integrated information) while highly regular systems often mark dysfunction or disease (Lipsitz and Goldberger, 1992; Vaillancourt and Newell, 2002).

The different methodological approaches, fMRI based “vascular” approaches on the one hand and electrophysiological methods such as EEG and MEG, on the other hand, indicate alterations of brain signal variability with aging. However, it remains unclear whether these different measures of brain variability at rest reflect the same underlying physiological changes. Evidently, there are some correlations between the two signal sources (for a review see, Jorge et al., 2014; Ritter and Villringer, 2006). For instance, in task-based EEG-fMRI simultaneous recordings, a relationship between BOLD responses and amplitude of evoked potentials has been demonstrated (e.g., Ritter et al., 2009; Seaquist et al., 2007), while in resting state EEG-fMRI studies, a negative association between spontaneous modulations of alpha rhythm and BOLD signal has also been established (e.g., Chang et al., 2013; Goldman et al., 2002; Gonçalves et al., 2006; Moosmann et al., 2003). Further, differential correlation patterns have been noted for the various rhythms of different frequencies in EEG/MEG and the fMRI signal, such that low-frequency oscillations show a negative (Deligianni et al., 2014; Mantini et al., 2007; Meyer et al., 2013), while higher frequencies oscillations demonstrate a positive correlation with the BOLD signal (Niessing et al., 2005; Scheeringa et al., 2011).

Regarding the known age-related changes in BOLD and EEG signal variability, respectively, the question arises whether these alterations are dominated by joint signal sources of fMRI and EEG or by – potentially different – signal contributions that relate to each of these two methods. Given the – potentially large – non-neuronal signal contribution, this issue is particularly relevant for rsfMRI studies. Here, we addressed this question analyzing rsfMRI and EEG measures of variability in healthy younger and older subjects. To our knowledge, the only study that compared variability in a “vascular” imaging method (rsfMRI) and an electrophysiological method (rsMEG at the sensor space) concluded that the effects of aging on BOLD signal variability were mainly driven by vascular factors (e.g., heart rate variability) and not well-explained by the changes in neural variability (Tsvetanov et al., 2015). The main aims of the present study were to explore i) age differences of brain signal variability measures, as well as to investigate ii) how neural variability derived from rsEEG related to the analogous parameters of BOLD signal variability derived from rsfMRI.

We used rsfMRI and rsEEG from the “Leipzig Study for Mind-Body-Emotion Interactions” (Babayan et al., 2019). As an explanatory analysis, we further investigated sex-related differences of brain signal variability measures. To measure the brain signal variability, we calculated the standard deviation (SD) of both the BOLD signal and of the amplitude envelope of the filtered rsEEG time series for a number of standard frequency bands at the source space. We hypothesized that brain signal variability would generally decrease with aging. In addition, based on the premise that BOLD fMRI signal variability reflects *neural* variability as measured by rsEEG, we expected that the corresponding changes in both signal modalities would demonstrate moderate to strong similarity in their spatial distribution. Given the confounding effects of vascular factors during aging on the fMRI signal (D’Esposito et al., 2003; Liu, 2013; Thompson, 2018), we further expected to find the relationship between BOLD and EEG signal variability to be stronger in younger than older adults.

## 2. Method

### 2.1. Participants

The data of the “Leipzig Study for Mind-Body-Emotion Interactions” (LEMON; Babayan et al., 2019) comprised 227 subjects in two age groups (younger: 20-35, older: 59-77). Only participants who did not report any neurological disorders, head injury, alcohol or other substance abuse, hypertension, pregnancy, claustrophobia, chemotherapy and malignant diseases, current and/or previous psychiatric disease or any medication affecting the cardiovascular and/or central nervous system in a telephone pre-screening were invited to the laboratory. The study protocol conformed to the Declaration of Helsinki and was approved by the ethics committee at the medical faculty of the University of Leipzig (reference number 154/13-ff).

RsEEG recordings were available for 216 subjects who completed the full study protocol. We excluded data from subjects that had missing event information ( $N=1$ ), different sampling rate ( $N=3$ ), mismatching header files or insufficient data quality ( $N=9$ ). Based on the rsfMRI quality assessment, we further excluded data from subjects with faulty preprocessing ( $N=7$ ), ghost artefacts ( $N=2$ ), incomplete data ( $N=1$ ), or excessive head motion ( $N=3$ ) (criterion: mean framewise displacement (FD)  $\leq 0.5$  mm; Power et al., 2012) (Supplementary Figure 1). The final sample included 135 younger ( $M = 25.10 \pm 3.70$  years, 42 females) and 54 older subjects ( $M = 67.15 \pm 4.52$  years, 27 females).

### 2.1. fMRI Acquisition

Brain imaging was performed on a 3T Siemens Magnetom Verio MR scanner (Siemens Medical Systems, Erlangen, Germany) with a standard 32-channel head coil. The participants were instructed to keep their eyes open and not fall asleep. The structural image was recorded using an MP2RAGE sequence (Marques et al., 2010) with the following parameters: TI 1 = 700 ms, TI 2 = 2500 ms, TR = 5000 ms, TE = 2.92 ms, FA 1 = 4°, FA 2 = 5°, band width = 240 Hz/pixel, FOV = 256 × 240 × 176 mm<sup>3</sup>, voxel size = 1 × 1 × 1 mm<sup>3</sup>. The functional images were acquired using a T2\*-weighted multiband EPI sequence with the following parameters: TR = 1400 ms, TE = 30 ms, FA = 69°, FOV = 202 mm, voxel size = 2.3 × 2.3 × 2.3 mm<sup>3</sup>, slice thickness = 2.3 mm, slice gap = 0.67 mm, 657 volumes, multiband acceleration factor = 4, duration = 15 min 30 s. A gradient echo field map with the sample geometry was used for distortion correction (TR = 680 ms, TE 1 = 5.19 ms, TE 2 = 7.65 ms).

## 2.2.fMRI Preprocessing

Preprocessing was implemented in Nipype (Gorgolewski et al., 2011), incorporating tools from FreeSurfer (Fischl, 2012), FSL (Jenkinson et al., 2012), AFNI (Cox, 1996), ANTs (Avants et al., 2011), CBS Tools (Bazin et al., 2014), and Nitime (Rokem et al., 2009). The pipeline comprised the following steps: (I) discarding the first five EPI volumes to allow for signal equilibration and steady state, (II) 3D motion correction (FSL mcflirt), (III) distortion correction (FSL fugue), (IV) rigid body coregistration of functional scans to the individual T1-weighted image (Freesurfer bbregister), (V) denoising including removal of 24 motion parameters (CPAC, Friston et al., 1996), motion, signal intensity spikes (Nipype rapidart), physiological noise in white matter and cerebrospinal fluid (CSF) (CompCor; Behzadi et al., 2007), together with linear and quadratic signal trends, (VI) band-pass filtering between 0.01-0.1 Hz (Nilearn), (VII) spatial normalization to MNI152 (Montreal Neurological Institute) standard space (2 mm isotropic) via transformation parameters derived during structural preprocessing (ANTS). (VIII) The data were then spatially smoothed with a 6-mm full-width half-maximum (FWHM) Gaussian kernel.

*BOLD Signal Variability ( $SD_{BOLD}$ )*. Standard deviation (SD) quantifies the amount of variation or dispersion in a set of values (Garrett et al., 2015; Grady and Garrett, 2018). Higher SD in rsfMRI signal indicates greater intensity of signal fluctuation or an increased level of activation in a given area (Garrett et al., 2011). We first calculated  $SD_{BOLD}$  across the whole time series for each voxel and then within 96 boundaries of preselected atlas-based regions of interests (ROIs) based on the Harvard-Oxford cortical atlas (Desikan et al., 2006). The main steps of deriving brain signal variability ( $SD_{BOLD}$ ) from the preprocessed fMRI signal are shown in Figure 1.

The reproducible workflows containing fMRI preprocessing details can be found here:

<https://github.com/NeuroanatomyAndConnectivity/pipelines/releases/tag/v2.0>.

## 2.3.EEG Recordings

Sixteen minutes of rsEEG were acquired on a separate day with BrainAmp MR-plus amplifiers using 61 ActiCAP electrodes (both Brain Products, Germany) attached according to the international standard 10-20 localization system (Jurcak et al., 2007) with FCz as a reference. The ground electrode was located at the sternum. Electrode impedance was kept below 5 k $\Omega$ . Continuous EEG activity was digitized at a sampling rate of 2500 Hz and band-pass filtered online between 0.015 Hz and 1 kHz.

The experimental session was divided into 16 blocks, each lasting 60 s, with two conditions interleaved, eyes closed (EC) and eyes open (EO), starting with the EC condition. Changes between blocks were announced with the software Presentation (v16.5, Neurobehavioral Systems Inc., USA). Participants were asked to sit comfortably in a chair in a dimly illuminated, sound-shielded Faraday recording room. During the EO periods, participants were instructed to stay awake while fixating a black cross presented on a white background. To maximize comparability, only EEG data from the EO condition were analyzed, since rsfMRI data were collected only in the EO condition.

## **2.4.EEG Data Analysis**

EEG processing and analyses were performed with custom Matlab (The MathWorks, Inc, Natick, Massachusetts, USA) scripts using functions from the EEGLAB environment (version 14.1.1b; Delorme and Makeig, 2004). The continuous EEG data were down-sampled to 250 Hz, band-pass filtered within 1–45 Hz (4<sup>th</sup> order back and forth Butterworth filter) and split into EO and EC conditions. Segments contaminated by large artefacts due to facial muscle tensions and gross movements were removed following visual inspection; rare occasions of artifactual channels were excluded from the analysis. The dimensionality of the data was reduced using principal component analysis (PCA) by selecting at least 30 principle components explaining 95% of the total variance. Next, using independent component analysis (Infomax; Bell and Sejnowski, 1995), the confounding sources e.g. eye-movements, eye-blinks, muscle activity, and residual ballistocardiographic artefacts were rejected from the data.

## **2.5.EEG Source Reconstruction**

Before conducting source reconstruction, preprocessed EEG signals were re-referenced to a common average. We incorporated a standard highly detailed finite element method (FEM) volume conduction model as described by Huang et al. (2016). The geometry of the FEM model was based on an extended MNI/ICBM152 (International Consortium for Brain Mapping) standard anatomy, where the source space constrained to cortical surface and parceled to 96 ROIs based on the Harvard-Oxford atlas (Desikan et al., 2006). The forward model was also expressed in MNI coordinates and determined using boundary element models as implemented in the M/EEG Toolbox of Hamburg (METH; Haufe and Ewald, 2016; Huang et al., 2016). The leadfield matrix was calculated between 1804 points located on the cortical surface to the 61 scalp electrodes. Source activity was

estimated using exact low-resolution tomography (eLORETA; Haufe and Ewald, 2016; Pascual-Marqui, 2007). Following the singular value decomposition (SVD) of each voxel's three-dimensional time course, the dominant orientation of the source signal was identified by preserving the first SVD component. We filtered into several frequency bands, associated with brain oscillations: delta (1–3 Hz), theta (4–8 Hz), alpha (8–12 Hz), and beta (15–25 Hz). The amplitude envelope of filtered oscillations was extracted using the Hilbert transform. Next, we applied temporal coarse graining by averaging data points in non-overlapping windows of length 0.5 s (Figure 1).

**EEG Variability ( $SD_{EEG}$ ).** We calculated the SD of amplitude envelope of band-pass filtered oscillations on the coarse-grained signal. rsEEG signal variability ( $SD_{EEG}$ ) was obtained for different frequency bands ( $SD_{DELTA}$ ,  $SD_{THETA}$ ,  $SD_{ALPHA}$ ,  $SD_{BETA}$ ) in each of 96 ROIs. Main steps toward deriving brain signal variability from the preprocessed EEG signal are shown in Figure 1. The raw and preprocessed fMRI and EEG data samples can be found at [https://ftp.gwdg.de/pub/misc/MPI-Leipzig\\_Mind-Brain-Body-LEMON/](https://ftp.gwdg.de/pub/misc/MPI-Leipzig_Mind-Brain-Body-LEMON/)

**Figure 1.** Main steps of deriving brain signal variability from the preprocessed resting state fMRI and EEG signal. We calculated the standard deviation of the blood oxygen level dependent (BOLD) signal and of the coarse-grained amplitude envelope of the rsEEG time series for a number of standard frequency bands at the source space.

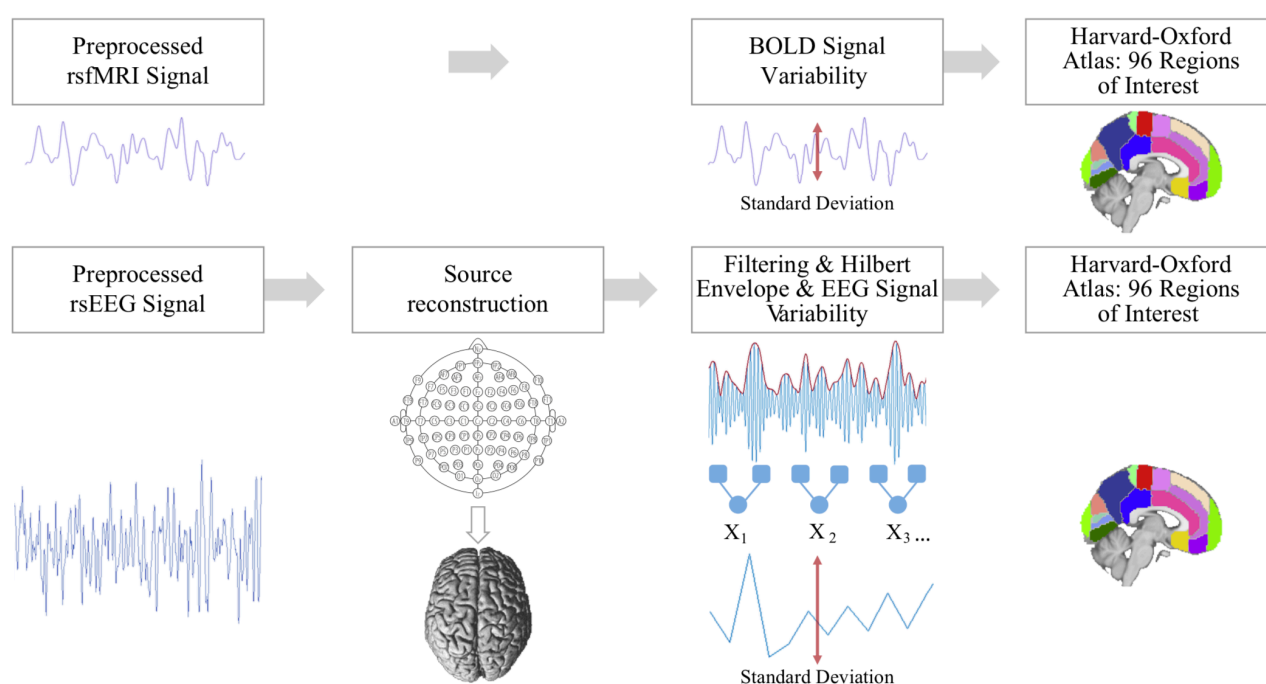

## 2.6. Statistical Analyses

*Mean  $SD_{BOLD}$  and  $SD_{EEG}$ .* For the topographic information (based on ROIs), the mean BOLD and EEG variability were calculated by I) log-transforming the SD values, II) averaging separately for younger and older subjects, and III) back-transforming then the values (McDonald, 2014).

*Age and Sex Effects.* A series of 2x2 (age group vs. sex) analyses of variance (ANOVAs) were applied to each ROI of brain signal variability values separately for  $SD_{BOLD}$  and  $SD_{EEG}$ , using controlling false discovery rate (FDR) according to Benjamini and Hochberg (1995) as correction for multiple comparisons. Significant group differences were further examined by Tukey HSD post-hoc comparisons.

The signal variability values were log-transformed to normalize  $SD_{BOLD}$  and  $SD_{EEG}$  before further analyses (assessed by Lilliefors test at a significance level of 0.05). Analyses were performed using R (R core team, 2018).

*$SD_{BOLD} - SD_{EEG}$  Correlation.* To investigate the association between each ROI of  $SD_{BOLD}$  and  $SD_{EEG}$ , we used pairwise Spearman's rank correlation separately for younger and older subjects, corrected for FDR (96 ROIs). We further applied sparse canonical correlation analysis (CCA) to show that the relationship between  $SD_{BOLD}$  and  $SD_{EEG}$  is not missed when only mass bivariate correlations are used. CCA is a multivariate method to find the independent linear combinations of variables such that the correlation between variables is maximized (Witten et al., 2009). The sparse CCA criterion is obtained by adding a Lasso Penalty function ( $l_1$ ), which performs continuous shrinkage and automatic variable selection and can solve statistical problems such as multicollinearity and overfitting (Tibshirani, 2011). We used  $l_1$  penalty as the regularization function to obtain sparse coefficients, that is, the canonical vectors (i.e., translating from full variables to a data matrix's low-rank components of variation) will contain exactly zero elements. Sparse CCA was performed using the R package PMA (Penalized Multivariate Analysis; Witten et al., 2009; <http://cran.r-project.org/web/packages/PMA/>). In our analyses, the significance of the correlation was estimated using the permutation approach (N=1000) as implemented in the CCA.permute function in R ( $p_{perm} < 0.05$ ).



### 3. Results

*Mean  $SD_{BOLD}$  and  $SD_{EEG}$ .* The topographic distribution of  $SD_{BOLD}$  in younger adults revealed the largest brain signal variability values in fronto-temporal regions while in older adults it was in the frontal and occipital areas. Further, we found strongest variability across younger subjects in occipito-temporal regions for  $SD_{DELTA}$ ,  $SD_{THETA}$ ,  $SD_{ALPHA}$ , and in medial frontal brain regions for  $SD_{BETA}$ , while older adults showed strongest brain signal variability in the fronto-central brain regions for  $SD_{DELTA}$ , in parietal-central brain regions for  $SD_{THETA}$ ,  $SD_{ALPHA}$ , and in medial frontal brain regions for  $SD_{BETA}$ . The details of topographic distribution of  $SD_{BOLD}$  and  $SD_{EEG}$  across age groups are available at Neurovault (<https://neurovault.org/collections/WWOKVUDV/>).

*Age and Sex Effects.* The 2x2 ANOVA analyses with  $SD_{BOLD}$  as dependent variable demonstrated that there was a significant main effect of age group in 49 ROIs in frontal, temporal, and occipital brain regions (F-values: 13.01–63.25; Figure 2). We also found a significant main effect of sex on  $SD_{BOLD}$  in 17 ROIs, mainly in frontal and occipital brain regions (F-values: 13.19–32.04; Figure 3) but no significant interaction between age group and sex (all  $p_{FDR} > 0.05$ ). Tukey HSD post-hoc analyses showed that older subjects had decreased  $SD_{BOLD}$  compared to younger adults which were presented in both sexes ( $n_{ROI} = 31$ , Supplementary Figure 3A). We further found that male subjects had higher  $SD_{BOLD}$ , that was restricted to the groups of younger adults in most of the significant ROIs ( $n_{ROI} = 12$ , Supplementary Figure 3B).

The 2x2 ANOVAs with  $SD_{EEG}$  as dependent variable showed significant main effects of age group in all frequency bands:  $SD_{DELTA}$  in 17 ROIs in occipital and frontal lobes (F-values: 12.77–25.64),  $SD_{THETA}$  in 13 ROIs in frontal (F-values: 14.18–36.62),  $SD_{ALPHA}$  in 13 ROIs in occipital (F-values: 13.35–18.83), and  $SD_{BETA}$  in 63 ROIs in central, fronto-temporal, and sensorimotor brain regions (F-values: 12.71–38.71), as shown in Figure 2. There were also significant main effects of sex in all frequency bands:  $SD_{DELTA}$  in 9 ROIs in occipital (F-values: 12.57–19.17),  $SD_{THETA}$  in 46 ROIs in occipital and temporal (F-values: 12.51–25.95),  $SD_{ALPHA}$  in 4 ROIs in frontal (F-values: 12.69–17.40), and  $SD_{BETA}$  in 61 ROIs in temporal, occipital, and frontal (F-values: 12.73–46.91), as shown in Figure 3. No significant interaction effects between age group and sex on  $SD_{EEG}$  were observed in any frequency band ( $p_{FDR} > 0.05$ ). Tukey HSD post-hoc analyses on  $SD_{EEG}$  showed that older subjects had less brain signal variability, which was present in both sexes for  $SD_{DELTA}$  ( $n_{ROI} = 11$ ),  $SD_{THETA}$  ( $n_{ROI} = 10$ ), and  $SD_{ALPHA}$  ( $n_{ROI} = 11$ ). Additionally, older adults showed higher  $SD_{BETA}$ , driven by female subjects ( $n_{ROI} = 39$ ) (Supplementary Figure 3A). With regard

to sex differences, post-hoc analyses showed that females had higher  $SD_{\Delta}$ ,  $SD_{\Theta}$ ,  $SD_{\alpha}$ , and  $SD_{\beta}$  than males. The sex differences in  $SD_{\Delta}$  ( $n_{ROI}=8$ ) were mostly pronounced in younger adults, while the effect of sex in  $SD_{\Theta}$  ( $n_{ROI}=29$ ) and  $SD_{\beta}$  ( $n_{ROI}=44$ ) were mainly presented in both age groups ( $p<0.05$ ) (Supplementary Figure 3B). The graphical distribution of the F-values for the main effects of age group or sex for each ROI are shown in Supplementary Figure 2. Additional tables and boxplots showing  $SD_{BOLD}$  and  $SD_{EEG}$  for each frequency band and in each the 96 ROIs, split up by age group and sex, are presented in the Supplementary Tables 1-5.

**Figure 2.** Spatial maps of significant age group differences in  $SD_{BOLD}$  and  $SD_{EEG}$ .

We calculated the standard deviation (SD) of the blood oxygen level dependent (BOLD) signal and of the coarse-grained amplitude envelope of the rsEEG time series for the delta (1–3 Hz), theta (4–8 Hz), alpha (8–12 Hz), and beta (15–25 Hz) frequency bands at the source space. Statistical significance was determined using 2x2 ANOVAs corrected for multiple comparisons by false discovery rates (FDR; Benjamini and Hochberg, 1995). Blue colored areas indicate where brain signal variability was lower in older than in younger adults, while red color indicates the opposite.

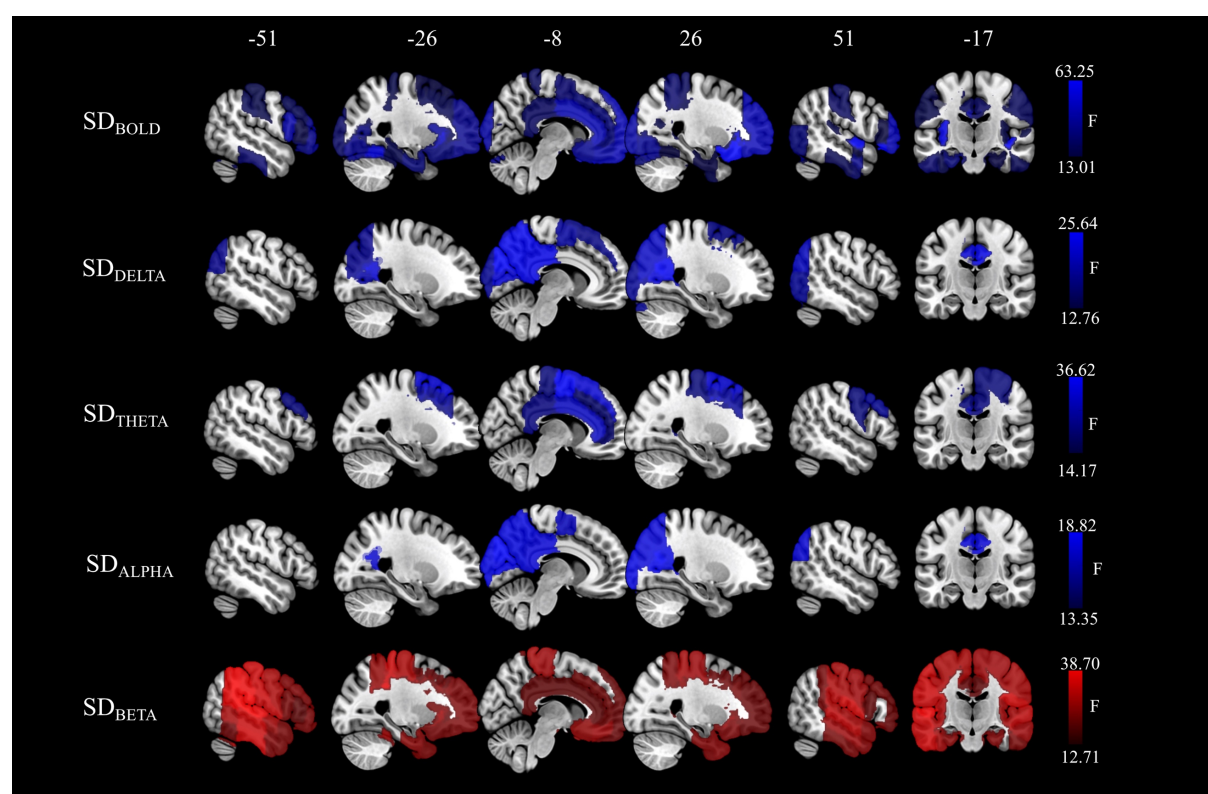

**Figure 3.** Spatial maps of significant sex differences in  $SD_{BOLD}$  and  $SD_{EEG}$ .

We calculated the standard deviation (SD) of the blood oxygen level dependent (BOLD) signal and of the coarse-grained amplitude envelope of the rsEEG time series for the delta (1–3 Hz), theta (4–8 Hz), alpha (8–12 Hz), and beta (15–25 Hz) frequency bands at the source space. Statistical significance was determined using 2x2 ANOVAs corrected for multiple comparisons by false discovery rates (FDR; Benjamini and Hochberg, 1995). Light blue indicates that the brain signal variability was higher in male subjects as compared to female subjects, and yellow indicates the opposite.

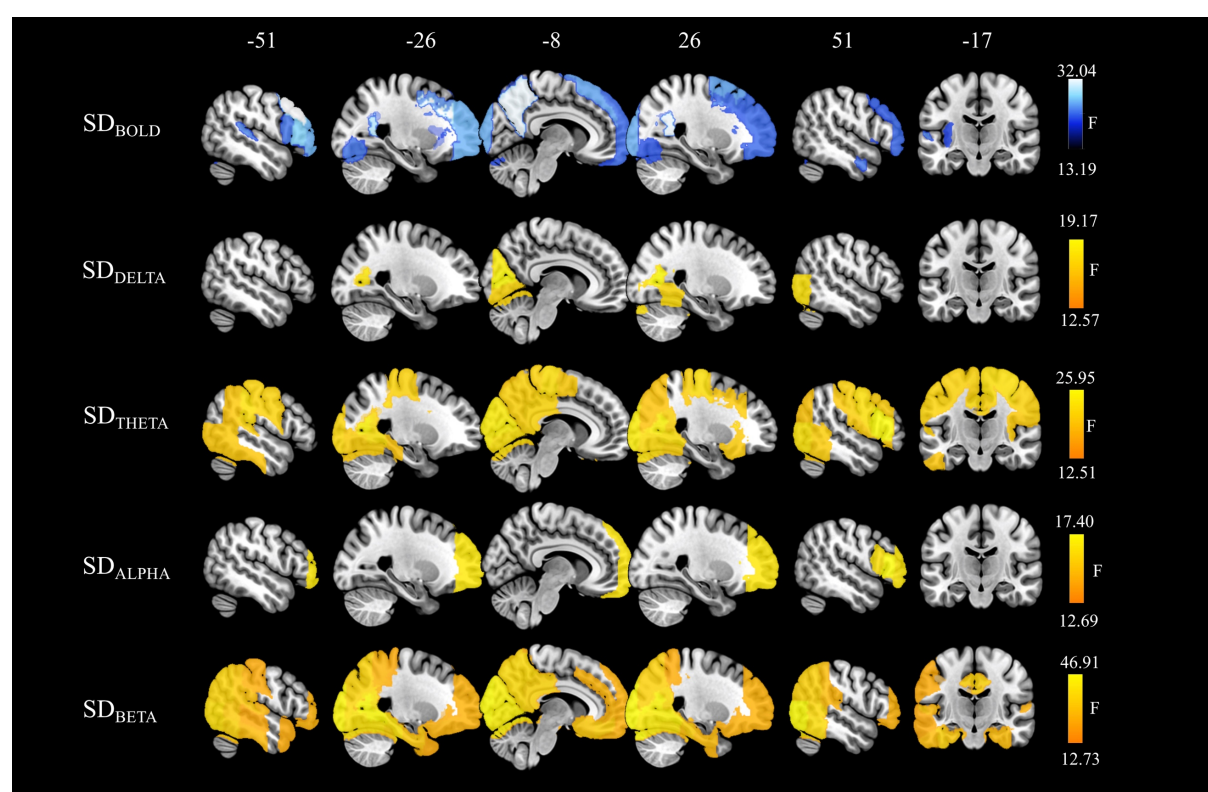

*SD<sub>BOLD</sub> – SD<sub>EEG</sub> Correlation.* The correlation coefficient of pairwise associations for 96 ROIs of SD<sub>BOLD</sub> with SD<sub>DELTA</sub>, SD<sub>THETA</sub>, SD<sub>ALPHA</sub>, and SD<sub>BETA</sub> ranged in younger adults from  $\rho = -0.200$  to  $\rho = 0.223$  (Figure 4A, Supplementary Table 6) and in older adults from  $\rho = 0.386$  to  $\rho = 0.349$  (Figure 4B, Supplementary Table 7). None of the pairwise associations between SD<sub>BOLD</sub> and SD<sub>EEG</sub> remained significant after the correction for multiple comparison corrections. Confirmatory multivariate sparse CCA further showed that correlations between SD<sub>BOLD</sub> and SD<sub>EEG</sub> across all subjects were rather low, highly sparse, and non-significant (SD<sub>DELTA</sub>;  $r = 0.145$ ,  $p_{\text{perm}} = 0.750$ ,  $l_1 = 0.367$ ; SD<sub>THETA</sub>;  $r = 0.143$ ,  $p_{\text{perm}} = 0.713$ ,  $l_1 = 0.7$ ; SD<sub>ALPHA</sub>;  $r = 0.153$ ,  $p_{\text{perm}} = 0.528$ ,  $l_1 = 0.1$ ; SD<sub>BETA</sub>;  $r = 0.232$ ,  $p_{\text{perm}} = 0.096$ ,  $l_1 = 0.633$ ).

**Figure 4.** The distribution of correlation coefficients ( $\rho$ ) for the association between SD<sub>BOLD</sub> and SD<sub>EEG</sub> in A) younger (N=135) and B) older (N=54) adults for different frequency bands. The correlations between SD<sub>BOLD</sub> and SD<sub>EEG</sub> were tested using pairwise Spearman's rank correlation corrected for multiple comparison by false discovery rates (FDR; Benjamini and Hochberg, 1995).

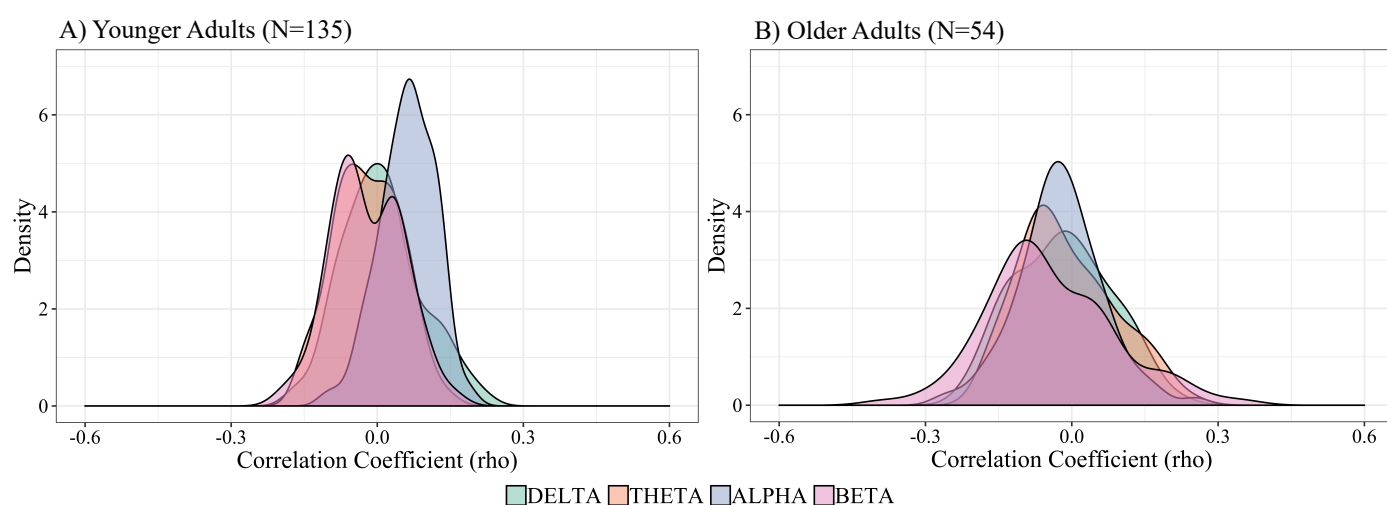

## 4. Discussion

Comparing healthy younger and older adults, we found widespread variability reductions in BOLD signal as well as in the amplitude envelope of delta, theta, and alpha frequency of rsEEG, whereas increased variability with aging was observed in the beta-band frequency. As a complementary analysis, we also explored sex differences and found that male subjects exhibited higher BOLD signal variability, while the sex differences in the rsEEG variability showed the opposite pattern. There were no significant correlations between hemodynamic ( $SD_{BOLD}$ ) and electrophysiological ( $SD_{EEG}$ ) measures of brain signal variability, neither in the younger nor in the older adults. Our results suggest that variability measures of rsfMRI and rsEEG – while both related to aging – are dominated by different physiological origins and relate differently to age and sex.

### 4.1. BOLD Signal Variability

The first aim of our study was to investigate the effect of age on BOLD signal variability, as measured by SD of spontaneous fluctuations during rsfMRI. Consistent with recent rsfMRI studies demonstrating that BOLD signal variability decreases with age in large-scale networks (Grady and Garrett, 2018; Nomi et al., 2017), we found that older subjects had reduced  $SD_{BOLD}$  in temporal and occipital brain regions but also in cortical midline structures like the precuneus, anterior and posterior cingulate cortices, as well as orbitofrontal cortex compared to younger adults. These age-related reductions in BOLD signal variability were thus especially apparent in regions of the Default Mode (DMN) and the Fronto-Parietal Network (FPN). The DMN is an intrinsically correlated network of brain regions, that is particularly active during rest or fixation blocks (Biswal et al., 2010). It reflects the systematic integration of information across the cortex (Margulies et al., 2016) and has been frequently associated with psychological functions like self-referential thought or mind-wandering, and also memory retrieval (Andrews-Hanna et al., 2014; Raichle, 2015). The FPN is involved in cognitive control processes (Spreng et al., 2013), and closely interacts with the DMN, for example during mind-wandering state (Golchert et al., 2017). Previous studies in healthy aging noted that older subjects showed lower connectivity as well as reduced network modularity and functional segregation in DMN and FPN regions (Damoiseaux, 2017; Damoiseaux et al., 2008; Meunier et al., 2009; Petersen et al., 2014). Similarly, an altered functional connectivity in the DMN has been found in different pathologies, for example, in Alzheimer's disease (Greicius et al., 2004) or mild cognitive impairment (Das et al., 2015). One can speculate that decreased BOLD signal variability in the DMN and the FPN,



particularly in the overlapping frontal brain regions, may be related to reduced modularity and integrity in the aging brain, that may reflect functional alterations involved in cognitive processes (Campbell et al., 2012). Therefore, characterizing BOLD signal variability and its transitions in age-related health conditions promises to further our understanding of basic neurocognitive functioning in aging.

In our exploratory analysis of sex differences, we found that male subjects exhibited higher BOLD signal variability in frontal, temporal, and occipital regions than female subjects. Sex-specific differences in brain structure and function have been previously shown (for a review see, Gong et al., 2011; Ruigrok et al., 2014; Sacher et al., 2013). For example, larger total brain volume has been reported in male as compared to female subjects (Gong et al., 2011), whereas higher cerebral blood flow (Gur et al., 1982; Rodriguez et al., 1988) and stronger functional connectivity in the DMN (Tomasi and Volkow, 2012) were found in females than males. Further, a cross-sectional study has demonstrated sex differences in functional connectivity in large-scale resting state networks in aging (Scheinost et al., 2015). Although the relationship between BOLD signal variability and functional connectivity has not been extensively examined, it has been suggested that they may capture similar functional properties (Grady and Garrett, 2018; Leo et al., 2012; Nomi et al., 2017). Assuming this relationship to be genuine, our results correspond to previous studies showing that males have higher functional connectivity strength in occipital, temporal and parietal regions than females (Biswal et al., 2010; Filippi et al., 2012; Ritchie et al., 2018).

## **4.2. Electrophysiological Signal Variability**

Measures of neural variability were derived from rsEEG for several main frequency bands (delta, theta, alpha, beta) as the standard deviation of their amplitude of envelope time series data, analogously to the BOLD signal variability. Multimodal imaging studies have shown that the amplitude envelope of neural oscillatory activity across frequency bands relates to different rsfMRI networks (Brookes et al., 2011; Deligianni et al., 2014), confirming the neurophysiological origin of the resting state networks measured with BOLD fMRI. Additionally, these studies also concluded that different frequency bands can be related to the same functional network, but also differentially to distinct networks (Brookes et al., 2011; Laufs et al., 2006; Mantini et al., 2007; Meyer et al., 2013). For instance, Mantini et al. (2007) reported that the visual network is associated with all frequency bands with the exclusion of the gamma rhythm, while the sensorimotor network is primarily associated with beta-band oscillations. We found age-dependent EEG signal variability changes within

networks which were associated with more than one frequency band, thus confirming that neurons generating oscillations at different frequencies may contribute to the same network. More precisely, we found age-related reductions in  $SD_{\Delta}$  and  $SD_{\alpha}$  mainly in a visual network (including calcarine regions, cuneal cortex, and occipital pole),  $SD_{\theta}$  in posterior DMN, while an enhancement of  $SD_{\beta}$  was mainly seen in the fronto-temporal and sensorimotor networks. These results align with previous reports of age-dependent changes of electrophysiological activity using spectral power (Dustman et al., 1993; Vlahou et al., 2015), and signal variability (Dustman et al., 1999; Tsvetanov et al., 2015). For instance, age-related decreases of alpha amplitude and alpha band variability (measured by SD of the oscillatory signal) were found in posterior and occipital brain regions (Babiloni et al., 2006; Tsvetanov et al., 2015). Alpha rhythm is a classical EEG hallmark of resting wakefulness (Laufs et al., 2003) that is modulated by thalamo-cortical and cortico-cortical interactions (Bazanov and Vernon, 2014; Goldman et al., 2002; Lopes Da Silva et al., 1997; Moosmann et al., 2003). It has been suggested that the posterior alpha-frequency plays an important role in the top-down control of cortical activation and excitability (Klimesch, 1999). Accordingly, decreased alpha variability in occipital regions might be associated with altered functioning of the cholinergic basal forebrain, affecting thalamo-cortical and cortico-cortical processing. Our finding of an higher fronto-temporal and sensorimotor  $SD_{\beta}$  in the elderly is in line with previous findings (Rossiter et al., 2014; Tsvetanov et al., 2015). Aging has previously been associated with an increase in movement-related beta-band attenuation, suggesting an enhanced motor cortex GABAergic inhibitory activity in older individuals (Rossiter et al., 2014). Similarly, beta-band activity is thought to play a key role in signaling maintenance of the status quo of the motor system, despite the absence of movement (Engel and Fries, 2010). Therefore, greater  $SD_{\beta}$  in sensorimotor brain regions could be interpreted as a compensatory mechanism to account for a decline of motor performance during aging (Quandt et al., 2016).

In addition to the effect of age on rsEEG signal variability, an exploratory analysis showed sex differences in distinct brain regions and EEG frequencies. More precisely, we found higher  $SD_{\Delta}$  in occipital,  $SD_{\theta}$  in occipito-temporal,  $SD_{\alpha}$  in frontal, and  $SD_{\beta}$  in frontal as well as occipito-temporal brain regions in female compared to male subjects. Previously, higher alpha (Aurlen et al., 2003), theta (Duffy et al., 1993), and beta power (Jaušovec and Jaušovec, 2010; Matsuura et al., 1985; Veldhuizen et al., 1993) have been reported in female relative to male subjects, while the reverse pattern was found in delta power (Zappasodi et al., 2006). Notably, different EEG frequencies were related to distinct hormonal level fluctuations (Becker et al., 1982; Solis-Ortiz et al., 1994). For instance,



reduced absolute theta and alpha power have been reported during the preovulatory phase while increased absolute beta power has been shown during and after the menstrual phase (Solis-Ortiz et al., 1994). Based on this evidence, one could speculate that the sex differences in rsEEG signal variability are related to hormonal variations.

#### **4.3. The Association between BOLD and EEG Variability**

We further assessed how neural variability in source-reconstructed rsEEG related to the analogous parameters of BOLD signal variability in rsfMRI using univariate and multivariate correlation analyses. Previously, simultaneous EEG-fMRI studies have shown meaningful relationships between fluctuations in EEG power, frequency, phase, and local BOLD changes (for a review see, Jorge et al., 2014; Ritter and Villringer, 2006). Due to age-related physiological (particularly cardiovascular) alterations in the brain, we expected the relationship between BOLD and EEG signal variability to be stronger in younger than older adults. However, in the present study, both univariate and multivariate analyses showed no significant correlations between  $SD_{BOLD}$  and  $SD_{EEG}$  neither in the younger nor in the older adults. This finding was supported by the distinct anatomical distributions of age-related changes in BOLD and EEG signal variability, that barely showed a spatial overlap, suggesting different underlying physiological processes. The precise nature of these physiological processes, however, remains speculative, but it seems likely that they include both neuronal and vascular components. The former are likely to be dominant for EEG- and MEG-based variability measures. However, BOLD signal variability seems to reflect both vascular and neural processes (Garrett et al., 2017). The vascular factors in the elderly are, among other things, related to the known morphological changes of blood vessels and metabolic changes with aging which are reflected in CBF (Ances et al., 2009; Martin et al., 1991),  $CMRO_2$  (Aanerud et al., 2012), and CVR (Liu et al., 2013). While neuronal components in the rsfMRI BOLD signal are also likely to be relevant (Garrett et al. 2017), the main finding of our study – little correlation with measures of EEG variability – indicates that these neuronal contributions do not dominate BOLD variability measures. While it cannot be excluded that our EEG-based variability measures reflect different aspects of neuronal function than BOLD variability, given these data, it would be desirable to perform – in future studies – concurrent electrophysiological and vascular neuroimaging for a comprehensive assessment of neuronal as well as vascular factors related to aging.

## 5. Limitations

There are several limitations of our study: EEG and MRI scans were not recorded simultaneously. Therefore, we could not directly relate the two signals in a cross-correlation analysis. Furthermore, EEG and MRI were performed with different body postures (fMRI; supine, EEG; seated) known to affect brain function, for example, changes in the amplitude of the EEG signal have been related to different body postures presumably due to the shifts in cerebrospinal fluid layer thickness (Rice et al., 2013). Moreover, subjects were instructed to lay or sit calm during the recording and not to think of anything particular. However, the participants' actual mental states at rest cannot be controlled or measured accurately, thereby, there might have been differences between the fMRI and EEG recordings. Yet, resting state measures of EEG (Näpflin et al., 2007) and fMRI (Shehzad et al., 2009; Zuo et al., 2010) have been shown to be reliable within-individuals across time. Thus, it is unlikely that there were systematic differences during resting state due to different timing of EEG and fMRI experiments. Finally, the computation of the source reconstructed rsEEG required the parcellation of the brain into relatively large anatomical ROIs. It could well be that the analysis with a higher spatial resolution (e.g., at the voxel-level) may provide additional insights about brain signal variability.

## 6. Conclusion

In this study, we report age and sex differences of brain signal variability obtained with rsfMRI and rsEEG from the same subjects. We demonstrate extensive age-related reduction of  $SD_{BOLD}$ ,  $SD_{DELTA}$ ,  $SD_{THETA}$ , and  $SD_{ALPHA}$  mainly in the DMN and the visual network, while a significant increase of  $SD_{BETA}$  was seen in fronto-temporal and sensorimotor brain regions. We could not demonstrate significant associations between  $SD_{BOLD}$  and  $SD_{EEG}$ . Our findings indicate that measurements of BOLD and EEG signal variability, respectively, are likely to stem from different physiological origins and relate differentially to age and sex. While the two types of measurements are thus not interchangeable, it seems, however, plausible that both markers of brain variability may provide complementary information about the aging process.

## **7. Funding**

This research did not receive any specific grant from funding agencies in the public, commercial, or not-for-profit sectors.

## **8. Acknowledgements**

We gratefully acknowledge the Mind-Body- Emotion group at the Max Planck Institute for Human Cognitive and Brain Sciences.

## 9. References

- Aanerud, J., Borghammer, P., Mallar Chakravarty, M., Vang, K., Rodell, A.B., Jónsdóttir, K.Y., Møller, A., Ashkanian, M., Vafae, M.S., Iversen, P., Johannsen, P., Gjedde, A., 2012. Brain energy metabolism and blood flow differences in healthy aging. *J. Cereb. Blood Flow Metab.* <https://doi.org/10.1038/jcbfm.2012.18>
- Ances, B.M., Liang, C.L., Leontiev, O., Perthen, J.E., Fleisher, A.S., Lansing, A.E., Buxton, R.B., 2009. Effects of aging on cerebral blood flow, oxygen metabolism, and blood oxygenation level dependent responses to visual stimulation. *Hum. Brain Mapp.* 30, 1120–1132. <https://doi.org/10.1002/hbm.20574>
- Andrews-Hanna, J.R., Smallwood, J., Spreng, R.N., 2014. The default network and self-generated thought: Component processes, dynamic control, and clinical relevance. *Ann. N. Y. Acad. Sci.* 1316, 29–52. <https://doi.org/10.1111/nyas.12360>
- Armbruster-Genc, D.J.N., Ueltzhoffer, K., Fiebach, C.J., 2016. Brain Signal Variability Differentially Affects Cognitive Flexibility and Cognitive Stability. *J. Neurosci.* 36, 3978–3987. <https://doi.org/10.1523/JNEUROSCI.2517-14.2016>
- Aurlen, H., Gjerde, I., Aarseth, J., Eldøen, G., Karlsen, B., Skeidsvoll, H., Gilhus, N., 2003. EEG background activity described by a large computerized database. *Clin. Neurophysiol.* 115, 665–673. <https://doi.org/10.1016/j.clinph.2003.10.019>
- Avants, B.B., Tustison, N.J., Song, G., Cook, P.A., Klein, A., Gee, J.C., 2011. A reproducible evaluation of ANTs similarity metric performance in brain image registration. *Neuroimage* 54, 2033–2044. <https://doi.org/10.1016/j.neuroimage.2010.09.025>
- Babayan, A., Erbey, M., Kumral, D., Reinelt, J.D., Reiter, A.M.F., Röbbig, J., Schaare, H.L., Uhlig, M., Anwender, A., Bazin, P.-L., Horstmann, A., Lampe, L., Nikulin, V. V., Okon-Singer, H., Preusser, S., Pampel, A., Rohr, C.S., Sacher, J., Thöne-Otto, A., Trapp, S., Nierhaus, T., Altmann, D., Arelin, K., Blöchl, M., Bongartz, E., Breig, P., Cesnaite, E., Chen, S., Cozatl, R., Czerwonatis, S., Dambrauskaite, G., Dreyer, M., Enders, J., Engelhardt, M., Fischer, M.M., Forschack, N., Golchert, J., Golz, L., Guran, C.A., Hedrich, S., Hentschel, N., Hoffmann, D.I., Huntenburg, J.M., Jost, R., Kosatschek, A., Kunzendorf, S., Lammers, H., Lauckner, M.E., Mahjoory, K., Kanaan, A.S., Mendes, N., Menger, R., Morino, E., Nätke, K., Neubauer, J., Noyan, H., Oligschläger, S., Panczyszyn-Trzewik, P., Poehlchen, D., Putzke, N., Roski, S., Schaller, M.-C., Schieferbein, A., Schlaak, B., Schmidt, R., Gorgolewski, K.J., Schmidt, H.M., Schrimpf, A., Stasch, S., Voss, M., Wiedemann, A., Margulies, D.S., Gaebler, M., Villringer, A., 2019. A mind-brain-body dataset of MRI, EEG, cognition, emotion, and peripheral

- physiology in young and old adults. *Sci. Data* 6, 180308.  
<https://doi.org/10.1038/sdata.2018.308>
- Babiloni, C., Binetti, G., Cassarino, A., Dal Forno, G., Del Percio, C., Ferreri, F., Ferri, R., Frisoni, G., Galderisi, S., Hirata, K., Lanuzza, B., Miniussi, C., Mucci, A., Nobili, F., Rodriguez, G., Romani, G.L., Rossini, P.M., Forno, G.D., Percio, C. Del, Ferreri, F., Ferri, R., Frisoni, G., Galderisi, S., Hirata, K., Lanuzza, B., Miniussi, C., Mucci, A., Nobili, F., Rodriguez, G., Romani, G.L., Rossini, P.M., 2006. Sources of cortical rhythms in adults during physiological aging: A multicentric EEG study. *Hum. Brain Mapp.* 27, 162–172. <https://doi.org/10.1002/hbm.20175>
- Bazanov, O.M., Vernon, D., 2014. Interpreting EEG alpha activity. *Neurosci. Biobehav. Rev.* 44, 94–110. <https://doi.org/10.1016/j.neubiorev.2013.05.007>
- Bazin, P.L., Weiss, M., Dinse, J., Schäfer, A., Trampel, R., Turner, R., 2014. A computational framework for ultra-high resolution cortical segmentation at 7 Tesla. *Neuroimage* 93, 201–209. <https://doi.org/10.1016/j.neuroimage.2013.03.077>
- Becker, D., Creutzfeldt, O.D., Schwibbe, M., Wuttke, W., 1982. Changes in physiological, eeg and psychological parameters in women during the spontaneous menstrual cycle and following oral contraceptives. *Psychoneuroendocrinology* 7, 75–90.  
[https://doi.org/10.1016/0306-4530\(82\)90057-9](https://doi.org/10.1016/0306-4530(82)90057-9)
- Behzadi, Y., Restom, K., Liau, J., Liu, T.T., 2007. A component based noise correction method (CompCor) for BOLD and perfusion based fMRI. *Neuroimage* 37, 90–101.  
<https://doi.org/10.1016/j.neuroimage.2007.04.042>
- Bell, A.J., Sejnowski, T.J., 1995. An Information-Maximization Approach to Blind Separation and Blind Deconvolution. *Neural Comput.* 7, 1129–1159.  
<https://doi.org/10.1162/neco.1995.7.6.1129>
- Benjamini, Y., Hochberg, Y., 1995. Controlling the False Discovery Rate : A Practical and Powerful Approach to Multiple Testing Author ( s ): Yoav Benjamini and Yosef Hochberg Source : *Journal of the Royal Statistical Society . Series B ( Methodological )*, Vol . 57 , No . 1 Published by : J. R. Stat. Soc. 57, 289–300.
- Birn, R.M., Murphy, K., Bandettini, P.A., 2008. The effect of respiration variations on independent component analysis results of resting state functional connectivity. *Hum. Brain Mapp.* 29, 740–750. <https://doi.org/10.1002/hbm.20577>
- Biswal, B.B., Mennes, M., Zuo, X.-N., 2010. Toward discovery science of human brain function. *Proc. Natl. Acad. Sci. U. S. A.* 107, 4734–4739.  
<https://doi.org/10.1073/pnas.0911855107>

- Brookes, M.J., Woolrich, M., Luckhoo, H., Price, D., Hale, J.R., Stephenson, M.C., Barnes, G.R., Smith, S.M., Morris, P.G., 2011. Investigating the electrophysiological basis of resting state networks using magnetoencephalography. *Proc. Natl. Acad. Sci.* 108, 16783–16788. <https://doi.org/10.1073/pnas.1112685108>
- Burgess, A., Gruzelier, J., 1993. Individual reliability of amplitude distribution in topographical mapping of EEG. *Electroencephalogr. Clin. Neurophysiol.* 86, 219–223. [https://doi.org/10.1016/0013-4694\(93\)90101-Z](https://doi.org/10.1016/0013-4694(93)90101-Z)
- Caballero-Gaudes, C., Reynolds, R.C., 2017. Methods for cleaning the BOLD fMRI signal. *Neuroimage* 154, 128–149. <https://doi.org/10.1016/j.neuroimage.2016.12.018>
- Cabeza, R., 2001. Cognitive neuroscience of aging: Contributions of functional neuroimaging. *Scand. J. Psychol.* 42, 277–286. <https://doi.org/10.1111/1467-9450.00237>
- Cabeza, R., Albert, M., Belleville, S., Craik, F.I.M., Duarte, A., Grady, C.L., Lindenberger, U., Nyberg, L., Park, D.C., Reuter-Lorenz, P.A., Rugg, M.D., Steffener, J., Rajah, M.N., 2018. Maintenance, reserve and compensation: the cognitive neuroscience of healthy ageing. *Nat. Rev. Neurosci.* 19, 701–710. <https://doi.org/10.1038/s41583-018-0068-2>
- Campbell, K.L., Grady, C.L., Ng, C., Hasher, L., 2012. Age differences in the frontoparietal cognitive control network: Implications for distractibility. *Neuropsychologia* 50, 2212–2223. <https://doi.org/10.1016/j.neuropsychologia.2012.05.025>
- Chang, C., Cunningham, J.P., Glover, G.H., 2009. Influence of heart rate on the BOLD signal: The cardiac response function. *Neuroimage* 44, 857–869. <https://doi.org/10.1016/j.neuroimage.2008.09.029>
- Chang, C., Liu, Z., Chen, M.C., Liu, X., Duyn, J.H., 2013. EEG correlates of time-varying BOLD functional connectivity. *Neuroimage* 72, 227–236. <https://doi.org/10.1016/j.neuroimage.2013.01.049>
- Cohen, M.X., 2017. Where Does EEG Come From and What Does It Mean? *Trends Neurosci.* 40, 208–218. <https://doi.org/10.1016/j.tins.2017.02.004>
- Cox, R.W., 1996. AFNI: Software for Analysis and Visualization of Functional Magnetic Resonance Neuroimages. *Comput. Biomed. Res.* 29, 162–173. <https://doi.org/10.1006/cbmr.1996.0014>
- D’Esposito, M., Deouell, L.Y., Gazzaley, A., 2003. Alterations in the BOLD fMRI signal with ageing and disease: a challenge for neuroimaging. *Nat. Rev. Neurosci.* 4, 863–872. <https://doi.org/10.1038/nrn1246>
- Damoiseaux, J.S., 2017. Effects of aging on functional and structural brain connectivity. *Neuroimage* 160, 32–40. <https://doi.org/10.1016/j.neuroimage.2017.01.077>

- Damoiseaux, J.S., Beckmann, C.F., Arigita, E.J.S., Barkhof, F., Scheltens, P., Stam, C.J., Smith, S.M., Rombouts, S.A.R.B., 2008. Reduced resting-state brain activity in the “default network” in normal aging. *Cereb. Cortex* 18, 1856–1864.  
<https://doi.org/10.1093/cercor/bhm207>
- Das, S.R., Pluta, J., Mancuso, L., Kliot, D., Yushkevich, P.A., Wolk, D.A., 2015. Anterior and posterior MTL networks in aging and MCI. *Neurobiol. Aging* 36, S141–S150.  
<https://doi.org/10.1016/j.neurobiolaging.2014.03.041>
- Deligianni, F., Centeno, M., Carmichael, D.W., Clayden, J.D., 2014. Relating resting-state fMRI and EEG whole-brain connectomes across frequency bands. *Front. Neurosci.* 8, 1–16. <https://doi.org/10.3389/fnins.2014.00258>
- Delorme, A., Makeig, S., 2004. EEGLAB: an open source toolbox for analysis of single-trial EEG dynamics including independent component analysis. *J. Neurosci. Methods* 134, 9–21. <https://doi.org/10.1016/j.jneumeth.2003.10.009>
- Desikan, R.S., Ségonne, F., Fischl, B., Quinn, B.T., Dickerson, B.C., Blacker, D., Buckner, R.L., Dale, A.M., Maguire, R.P., Hyman, B.T., Albert, M.S., Killiany, R.J., 2006. An automated labeling system for subdividing the human cerebral cortex on MRI scans into gyral based regions of interest. *Neuroimage* 31, 968–980.  
<https://doi.org/10.1016/j.neuroimage.2006.01.021>
- Duffy, F.H., McAnulty, G.B., Albert, M.S., 1993. The pattern of age-related differences in electrophysiological activity of healthy males and females. *Neurobiol. Aging* 14, 73–84.  
[https://doi.org/10.1016/0197-4580\(93\)90025-7](https://doi.org/10.1016/0197-4580(93)90025-7)
- Dustman, R.E., Shearer, D.E., Emmerson, R.Y., 1999. Life-span changes in EEG spectral amplitude, amplitude variability and mean frequency. *Clin. Neurophysiol.* 110, 1399–1409. [https://doi.org/10.1016/S1388-2457\(99\)00102-9](https://doi.org/10.1016/S1388-2457(99)00102-9)
- Dustman, R.E., Shearer, D.E., Emmerson, R.Y., 1993. EEG and event-related potentials in normal aging. *Prog. Neurobiol.* 41, 369–401. [https://doi.org/10.1016/0301-0082\(93\)90005-D](https://doi.org/10.1016/0301-0082(93)90005-D)
- Engel, A.K., Fries, P., 2010. Beta-band oscillations-signalling the status quo? *Curr. Opin. Neurobiol.* 20, 156–165. <https://doi.org/10.1016/j.conb.2010.02.015>
- Failla, M., Grappiolo, A., Emanuelli, G., Vitale, G., Frascini, N., Bigoni, M., Grieco, N., Denti, M., Giannattasio, C., Mancina, G., 1999. Sympathetic tone restrains arterial distensibility of healthy and atherosclerotic subjects. *J. Hypertens.* 17, 1117–1123.  
<https://doi.org/10.1097/00004872-199917080-00011>
- Farkas, E., Luiten, P.G.M., 2001. Cerebral microvascular pathology in aging and Alzheimer’s



- disease, *Progress in Neurobiology*. [https://doi.org/10.1016/S0301-0082\(00\)00068-X](https://doi.org/10.1016/S0301-0082(00)00068-X)
- Fernández, A., Zuluaga, P., Abásolo, D., Gómez, C., Serra, A., Méndez, M.A., Hornero, R., 2012. Brain oscillatory complexity across the life span. *Clin. Neurophysiol.* 123, 2154–2162. <https://doi.org/10.1016/j.clinph.2012.04.025>
- Filippi, M., Valsasina, P., Misci, P., Falini, A., Comi, G., Rocca, M.A., 2012. The Organization of Intrinsic Brain Activity Differs Between Genders : A Resting-State FMRI Study in a Large Cohort of Young Healthy Subjects 000. <https://doi.org/10.1002/hbm.21514>
- Fischl, B., 2012. FreeSurfer. *Neuroimage* 62, 774–781. <https://doi.org/10.1016/j.neuroimage.2012.01.021>
- Friston, K.J., Williams, S., Howard, R., Frackowiak, R.S.J., Turner, R., 1996. Movement-related effects in fMRI time-series. *Magn. Reson. Med.* 35, 346–355. <https://doi.org/10.1002/mrm.1910350312>
- Garrett, D.D., Kovacevic, N., McIntosh, A.R., Grady, C.L., 2013a. The modulation of BOLD variability between cognitive states varies by age and processing speed. *Cereb. Cortex* 23, 684–693. <https://doi.org/10.1093/cercor/bhs055>
- Garrett, D.D., Lindenberger, U., Hoge, R.D., Gauthier, C.J., 2017. Age differences in brain signal variability are robust to multiple vascular controls. *Sci. Rep.* 7, 10149. <https://doi.org/10.1038/s41598-017-09752-7>
- Garrett, D.D., Nagel, I.E., Preuschhof, C., Burzynska, A.Z., Marchner, J., Wiegert, S., Jungehülsing, G.J., Nyberg, L., Villringer, A., Li, S.-C., Heekeren, H.R., Bäckman, L., Lindenberger, U., 2015. Amphetamine modulates brain signal variability and working memory in younger and older adults. *Proc. Natl. Acad. Sci.* 112, 7593–7598. <https://doi.org/10.1073/pnas.1504090112>
- Garrett, D.D., Samanez-Larkin, G.R., MacDonald, S.W.S., Lindenberger, U., McIntosh, A.R., Grady, C.L., 2013b. Moment-to-moment brain signal variability: A next frontier in human brain mapping? *Neurosci. Biobehav. Rev.* 37, 610–624. <https://doi.org/10.1016/j.neubiorev.2013.02.015>
- Geerligs, L., Tsvetanov, K.A., Cam-CAN, Henson, R.N., 2017. Challenges in measuring individual differences in functional connectivity using fMRI: The case of healthy aging. *Hum. Brain Mapp.* 38, 4125–4156. <https://doi.org/10.1002/hbm.23653>
- Golchert, J., Smallwood, J., Jefferies, E., Seli, P., Huntenburg, J.M., Liem, F., Lauckner, M.E., Oligschläger, S., Bernhardt, B.C., Villringer, A., Margulies, D.S., 2017. Individual variation in intentionality in the mind-wandering state is reflected in the integration of

- the default-mode, fronto-parietal, and limbic networks. *Neuroimage* 146, 226–235.  
<https://doi.org/10.1016/j.neuroimage.2016.11.025>
- Goldman, R.I., Stern, J.M., Engel, J., Cohen, M.S., 2002. Simultaneous EEG and fMRI of the alpha rhythm. *Neuroreport* 13, 2487–2492. <https://doi.org/10.1097/00001756-200212200-00022>
- Gonçalves, S.I., De Munck, J.C., Pouwels, P.J.W., Schoonhoven, R., Kuijer, J.P.A., Maurits, N.M., Hoogduin, J.M., Van Someren, E.J.W., Heethaar, R.M., Lopes Da Silva, F.H., 2006. Correlating the alpha rhythm to BOLD using simultaneous EEG/fMRI: Inter-subject variability. *Neuroimage* 30, 203–213.  
<https://doi.org/10.1016/j.neuroimage.2005.09.062>
- Gong, G., He, Y., Evans, A.C., 2011. Brain connectivity: Gender makes a difference. *Neuroscientist* 17, 575–591. <https://doi.org/10.1177/1073858410386492>
- Gorgolewski, K., Burns, C.D., Madison, C., Clark, D., Halchenko, Y.O., Waskom, M.L., Ghosh, S.S., 2011. Nipype: A Flexible, Lightweight and Extensible Neuroimaging Data Processing Framework in Python. *Front. Neuroinform.* 5, 13.  
<https://doi.org/10.3389/fninf.2011.00013>
- Grady, C., 2012. The cognitive neuroscience of ageing. *Nat. Rev. Neurosci.* 13, 491–505.  
<https://doi.org/10.1038/nrn3256>
- Grady, C.L., Garrett, D.D., 2018. Brain signal variability is modulated as a function of internal and external demand in younger and older adults. *Neuroimage* 169, 510–523.  
<https://doi.org/10.1016/j.neuroimage.2017.12.031>
- Grady, C.L., Garrett, D.D., 2014. Understanding variability in the BOLD signal and why it matters for aging. *Brain Imaging Behav.* <https://doi.org/10.1007/s11682-013-9253-0>
- Greicius, M.D., Srivastava, G., Reiss, A.L., Menon, V., 2004. Default-mode network activity distinguishes Alzheimer’s disease from healthy aging: evidence from functional MRI. *Proc. Natl. Acad. Sci. U. S. A.* 101, 4637–42. <https://doi.org/10.1073/pnas.0308627101>
- Gur, R.C., Gur, R.E., Obrist, W.D., Hungerbuhler, J.P., YOUNKIN, D., Rosen, A.D., Skolnick, B.E., Reivich, M., 1982. Sex and handedness differences in cerebral blood flow during rest and cognitive activity. *Science* (80-. ). 217, 659–661.  
<https://doi.org/10.1126/science.7089587>
- Haufe, S., Ewald, A., 2016. A Simulation Framework for Benchmarking EEG-Based Brain Connectivity Estimation Methodologies. *Brain Topogr.* 1–18.  
<https://doi.org/10.1007/s10548-016-0498-y>
- Hawkes, C.H., Prescott, R.J., 1973. EEG variation in healthy subjects. *Electroencephalogr.*

- Clin. Neurophysiol. 34, 197–199. [https://doi.org/10.1016/0013-4694\(73\)90048-5](https://doi.org/10.1016/0013-4694(73)90048-5)
- Huang, Y., Parra, L.C., Haufe, S., 2016. The New York Head—A precise standardized volume conductor model for EEG source localization and tES targeting. *Neuroimage* 140, 150–162. <https://doi.org/10.1016/j.neuroimage.2015.12.019>
- Hudetz, A.G., Biswal, B.B., Shen, H., Lauer, K.K., Kampine, J.P., 1998. Spontaneous Fluctuations in Cerebral Oxygen Supply. Springer, Boston, MA, pp. 551–559. [https://doi.org/10.1007/978-1-4615-4863-8\\_66](https://doi.org/10.1007/978-1-4615-4863-8_66)
- Jaušovec, N., Jaušovec, K., 2010. Resting brain activity: Differences between genders. *Neuropsychologia* 48, 3918–3925. <https://doi.org/10.1016/j.neuropsychologia.2010.09.020>
- Jenkinson, M., Beckmann, C.F., Behrens, T.E.J., Woolrich, M.W., Smith, S.M., 2012. Fsl. *Neuroimage* 62, 782–790. <https://doi.org/10.1016/j.neuroimage.2011.09.015>
- Jorge, J., Van der Zwaag, W., Figueiredo, P., 2014. EEG-fMRI integration for the study of human brain function. *Neuroimage* 102, 24–34. <https://doi.org/10.1016/j.neuroimage.2013.05.114>
- Jurcak, V., Tsuzuki, D., Dan, I., 2007. 10/20, 10/10, and 10/5 systems revisited: Their validity as relative head-surface-based positioning systems. *Neuroimage* 34, 1600–1611. <https://doi.org/10.1016/j.neuroimage.2006.09.024>
- Kielar, A., Deschamps, T., Chu, R.K.O., Jokel, R., Khatamian, Y.B., Chen, J.J., Meltzer, J.A., 2016. Identifying dysfunctional cortex: Dissociable effects of stroke and aging on resting state dynamics in MEG and fmri. *Front. Aging Neurosci.* 8. <https://doi.org/10.3389/fnagi.2016.00040>
- Klimesch, W., 1999. EEG alpha and theta oscillations reflect cognitive and memory performance: A review and analysis. *Brain Res. Rev.* 29, 169–195. [https://doi.org/10.1016/S0165-0173\(98\)00056-3](https://doi.org/10.1016/S0165-0173(98)00056-3)
- Labrenz, F., Ferri, F., Wrede, K., Forsting, M., Schedlowski, M., Engler, H., Elsenbruch, S., Benson, S., Costantini, M., 2018. Altered temporal variance and functional connectivity of BOLD signal is associated with state anxiety during acute systemic inflammation. *Neuroimage* 184, 916–924. <https://doi.org/10.1016/j.neuroimage.2018.09.056>
- Laufs, H., Kleinschmidt, A., Holt, J.L., Elfont, R., Krams, M., Paul, J.S., Krakow, K., 2006. Where the BOLD signal goes when alpha EEG leaves. *Neuroimage* 31, 1408–1418. <https://doi.org/10.1016/j.neuroimage.2006.02.002>
- Laufs, H., Krakow, K., Sterzer, P., Eger, E., Beyerle, A., Kleinschmidt, A., 2003. Electroencephalographic signatures of attentional and cognitive default modes in

spontaneous brain activity fluctuations at rest 100.

- Leo, A., Bernardi, G., Handjaras, G., Bonino, D., Ricciardi, E., Pietrini, P., 2012. Increased BOLD Variability in the Parietal Cortex and Enhanced Parieto-Occipital Connectivity during Tactile Perception in Congenitally Blind Individuals. *Neural Plast.* 2012, 1–8. <https://doi.org/10.1155/2012/720278>
- Lipsitz, L.A., Goldberger, A.L., 1992. Loss of ‘Complexity’ and Aging: Potential Applications of Fractals and Chaos Theory to Senescence. *JAMA J. Am. Med. Assoc.* 267, 1806–1809. <https://doi.org/10.1001/jama.1992.03480130122036>
- Liu, P., Hebrank, A.C., Rodrigue, K.M., Kennedy, K.M., Section, J., Park, D.C., Lu, H., 2013. Age-related differences in memory-encoding fMRI responses after accounting for decline in vascular reactivity. *Neuroimage* 78, 415–425. <https://doi.org/10.1016/j.neuroimage.2013.04.053>
- Liu, T.T., 2013. Neurovascular factors in resting-state functional MRI. *Neuroimage* 80, 339–348. <https://doi.org/10.1016/j.neuroimage.2013.04.071>
- Logothetis, N.K., 2008. What we can do and what we cannot do with fMRI. *Nature* 453, 869–878. <https://doi.org/10.1038/nature06976>
- Logothetis, N.K., Wandell, B.A., 2004. Interpreting the BOLD Signal. *Annu. Rev. Physiol.* 66, 735–769. <https://doi.org/10.1146/annurev.physiol.66.082602.092845>
- Lopes Da Silva, F.H., Pijn, J.P., Velis, D., Nijssen, P.C.G., 1997. Alpha rhythms: Noise, dynamics and models. *Int. J. Psychophysiol.* 26, 237–249. [https://doi.org/10.1016/S0167-8760\(97\)00767-8](https://doi.org/10.1016/S0167-8760(97)00767-8)
- Lopez-Larson, M.P., Anderson, J.S., Ferguson, M.A., Yurgelun-Todd, D., 2011. Local brain connectivity and associations with gender and age. *Dev. Cogn. Neurosci.* 1, 187–197. <https://doi.org/10.1016/j.dcn.2010.10.001>
- Maltez, J., Hyllienmark, L., Nikulin, V. V., Brismar, T., 2004. Time course and variability of power in different frequency bands of EEG during resting conditions. *Neurophysiol. Clin.* 34, 195–202. <https://doi.org/10.1016/j.neucli.2004.09.003>
- Mantini, D., Perrucci, M.G., Del Gratta, C., Romani, G.L., Corbetta, M., 2007. Electrophysiological signatures of resting state networks in the human brain. *Proc. Natl. Acad. Sci.* 104, 13170–13175. <https://doi.org/10.1073/pnas.0700668104>
- Margulies, D.S., Ghosh, S.S., Goulas, A., Falkiewicz, M., Huntenburg, J.M., Langs, G., Bezgin, G., Eickhoff, S.B., Castellanos, F.X., Petrides, M., Jefferies, E., Smallwood, J., 2016. Situating the default-mode network along a principal gradient of macroscale cortical organization. *Proc. Natl. Acad. Sci.* 113, 12574–12579.

- <https://doi.org/10.1073/pnas.1608282113>
- Martin, J., Friston, K.J., Colebatch, J.G., Frackowiak, R.S.J., Unit, M.R.C.C., Hospital, H., 1991. Decreases in Regional Cerebral Blood Flow with Normal Aging 684–689.
- Matsuura, M., Yamamoto, K., Fukuzawa, H., Okubo, Y., Uesugi, H., Moriiwa, M., Kojima, T., Shimazono, Y., 1985. Age development and sex differences of various EEG elements in healthy children and adults - Quantification by a computerized waveform recognition method. *Electroencephalogr. Clin. Neurophysiol.* 60, 394–406.
- [https://doi.org/10.1016/0013-4694\(85\)91013-2](https://doi.org/10.1016/0013-4694(85)91013-2)
- McBride, J.C., Zhao, X., Munro, N.B., Smith, C.D., Jicha, G.A., Hively, L., Broster, L.S., Schmitt, F.A., Kryscio, R.J., Jiang, Y., 2014. Spectral and complexity analysis of scalp EEG characteristics for mild cognitive impairment and early Alzheimer’s disease. *Comput. Methods Programs Biomed.* 114, 153–163.
- <https://doi.org/10.1016/j.cmpb.2014.01.019>
- McDonald, J.H., 2014. *Handbook of Biological Statistics*. Sparky House Publ. 180–185.
- Meunier, D., Achard, S., Morcom, A., Bullmore, E., 2009. Age-related changes in modular organization of human brain functional networks. *Neuroimage* 44, 715–723.
- <https://doi.org/10.1016/j.neuroimage.2008.09.062>
- Meyer, M.C., Janssen, R.J., Van Oort, E.S.B., Beckmann, C.F., Barth, M., 2013. The Quest for EEG Power Band Correlation with ICA Derived fMRI Resting State Networks. *Front. Hum. Neurosci.* 7, 315. <https://doi.org/10.3389/fnhum.2013.00315>
- Moosmann, M., Ritter, P., Krastel, I., Brink, A., Thees, S., Blankenburg, F., Taskin, B., Obrig, H., Villringer, A., 2003. Correlates of alpha rhythm in functional magnetic resonance imaging and near infrared spectroscopy. *Neuroimage* 20, 145–158.
- [https://doi.org/10.1016/S1053-8119\(03\)00344-6](https://doi.org/10.1016/S1053-8119(03)00344-6)
- Murayama, Y., Bießmann, F., Logothetis, N.K., Oeltermann, A., Müller, K.-R., Meinecke, F.C., Augath, M., 2010. Relationship between neural and hemodynamic signals during spontaneous activity studied with temporal kernel CCA. *Magn. Reson. Imaging* 28, 1095–1103. <https://doi.org/10.1016/j.mri.2009.12.016>
- Näpflin, M., Wildi, M., Sarnthein, J., 2007. Test-retest reliability of resting EEG spectra validates a statistical signature of persons. *Clin. Neurophysiol.* 118, 2519–2524.
- <https://doi.org/10.1016/j.clinph.2007.07.022>
- Niessing, J., Ebisch, B., Schmidt, K.E., Niessing, M., Singer, W., Galuske, R.A.W., 2005. Neuroscience: Hemodynamic signals correlate tightly with synchronized gamma oscillations. *Science* (80-. ). 309, 948–951. <https://doi.org/10.1126/science.1110948>

- Nomi, J.S., Bolt, T.S., Ezie, C.E.C., Uddin, L.Q., Heller, A.S., 2017. Moment-to-Moment BOLD Signal Variability Reflects Regional Changes in Neural Flexibility across the Lifespan. *J. Neurosci.* 37, 5539–5548. <https://doi.org/10.1523/JNEUROSCI.3408-16.2017>
- Nomi, J.S., Schettini, E., Voorhies, W., Bolt, T.S., Heller, A.S., Uddin, L.Q., 2018. Resting-State Brain Signal Variability in Prefrontal Cortex Is Associated With ADHD Symptom Severity in Children. *Front. Hum. Neurosci.* 12, 90. <https://doi.org/10.3389/fnhum.2018.00090>
- Oken, B.S., Chiappa, K.H., 1988. Short-term variability in EEG frequency analysis. *Electroencephalogr. Clin. Neurophysiol.* 69, 191–198. [https://doi.org/10.1016/0013-4694\(88\)90128-9](https://doi.org/10.1016/0013-4694(88)90128-9)
- Pascual-Marqui, R.D., 2007. Discrete, 3D distributed, linear imaging methods of electric neuronal activity. Part 1: exact, zero error localization.
- Petersen, S.E., Savalia, N.K., Chan, M.Y., Park, D.C., Wig, G.S., 2014. Decreased segregation of brain systems across the healthy adult lifespan. *Proc. Natl. Acad. Sci.* 111, E4997–E5006. <https://doi.org/10.1073/pnas.1415122111>
- Quandt, F., Bönstrup, M., Schulz, R., Timmermann, J.E., Zimmerman, M., Nolte, G., Hummel, F.C., 2016. Spectral variability in the aged brain during fine motor control. *Front. Aging Neurosci.* 8. <https://doi.org/10.3389/fnagi.2016.00305>
- Raichle, M.E., 2015. The Brain’s Default Mode Network. *Annu. Rev. Neurosci.* 38, 433–447. <https://doi.org/10.1146/annurev-neuro-071013-014030>
- Rice, J.K., Rorden, C., Little, J.S., Parra, L.C., 2013. Subject position affects EEG magnitudes. *Neuroimage* 64, 476–484. <https://doi.org/10.1016/j.neuroimage.2012.09.041>
- Ritchie, S.J., Cox, S.R., Shen, X., Lombardo, M. V., Reus, L.M., Alloza, C., Harris, M.A., Alderson, H.L., Hunter, S., Neilson, E., Liewald, D.C.M., Auyeung, B., Whalley, H.C., Lawrie, S.M., Gale, C.R., Bastin, M.E., McIntosh, A.M., Deary, I.J., 2018. Sex differences in the adult human brain: Evidence from 5216 UK biobank participants. *Cereb. Cortex* 28, 2959–2975. <https://doi.org/10.1093/cercor/bhy109>
- Ritter, P., Moosmann, M., Villringer, A., 2009. Rolandic alpha and beta EEG rhythms’ strengths are inversely related to fMRI-BOLD signal in primary somatosensory and motor cortex. *Hum. Brain Mapp.* 30, 1168–1187. <https://doi.org/10.1002/hbm.20585>
- Ritter, P., Villringer, A., 2006. Simultaneous EEG-fMRI. *Neurosci. Biobehav. Rev.* 30, 823–838. <https://doi.org/10.1016/j.neubiorev.2006.06.008>
- Rodriguez, G., Warkentin, S., Risberg, J., Rosadini, G., 1988. Sex differences in regional



- cerebral blood flow. *J. Cereb. Blood Flow Metab.* 8, 783–789.  
<https://doi.org/10.1038/jcbfm.1988.133>
- Rokem, a, Trumpis, M., Perez, F., 2009. Nitime: time-series analysis for neuroimaging data. *Proc. 8th Python Sci. Conf. (SciPy 2009)* 1–8.
- Rossiter, H.E., Davis, E.M., Clark, E. V., Boudrias, M.H., Ward, N.S., 2014. Beta oscillations reflect changes in motor cortex inhibition in healthy ageing. *Neuroimage* 91, 360–365.  
<https://doi.org/10.1016/j.neuroimage.2014.01.012>
- Ruigrok, A.N.V., Salimi-Khorshidi, G., Lai, M.C., Baron-Cohen, S., Lombardo, M. V., Tait, R.J., Suckling, J., 2014. A meta-analysis of sex differences in human brain structure. *Neurosci. Biobehav. Rev.* 39, 34–50. <https://doi.org/10.1016/j.neubiorev.2013.12.004>
- Sacher, J., Neumann, J., Okon-Singer, H., Gotowiec, S., Villringer, A., 2013. Sexual dimorphism in the human brain: Evidence from neuroimaging. *Magn. Reson. Imaging* 31, 366–375. <https://doi.org/10.1016/j.mri.2012.06.007>
- Scheeringa, R., Fries, P., Petersson, K.M., Oostenveld, R., Grothe, I., Norris, D.G., Hagoort, P., Bastiaansen, M.C.M., 2011. Neuronal Dynamics Underlying High- and Low-Frequency EEG Oscillations Contribute Independently to the Human BOLD Signal. *Neuron* 69, 572–583. <https://doi.org/10.1016/j.neuron.2010.11.044>
- Scheinost, D., Finn, E.S., Tokoglu, F., Shen, X., Papademetris, X., Hampson, M., Constable, R.T., 2015. Sex differences in normal age trajectories of functional brain networks. *Hum. Brain Mapp.* 36, 1524–1535. <https://doi.org/10.1002/hbm.22720>
- Seaquist, E.R., Chen, W., Benedict, L.E., Ugurbil, K., Kwag, J.H., Zhu, X.H., Nelson, C.A., 2007. Insulin reduces the BOLD response but is without effect on the VEP during presentation of a visual task in humans. *J. Cereb. Blood Flow Metab.* 27, 154–160.  
<https://doi.org/10.1038/sj.jcbfm.9600316>
- Shehzad, Z., Kelly, A.M.C., Reiss, P.T., Gee, D.G., Gotimer, K., Uddin, L.Q., Lee, S.H., Margulies, D.S., Roy, A.K., Biswal, B.B., Petkova, E., Castellanos, F.X., Milham, M.P., 2009. The Resting Brain: Unconstrained yet Reliable. *Cereb. Cortex* 19, 2209–2229.  
<https://doi.org/10.1093/cercor/bhn256>
- Sleimen-Malkoun, R., Perdakis, D., Muller, V., Blanc, J.-L., Huys, R., Temprado, J.-J., Jirsa, V.K., 2015. Brain Dynamics of Aging: Multiscale Variability of EEG Signals at Rest and during an Auditory Oddball Task. *eNeuro* 2.  
<https://doi.org/10.1523/ENEURO.0067-14.2015>
- Smits, F.M., Porcaro, C., Cottone, C., Cancelli, A., Rossini, P.M., Tecchio, F., 2016. Electroencephalographic fractal dimension in healthy ageing and Alzheimer’s disease.



- PLoS One 11, 1–16. <https://doi.org/10.1371/journal.pone.0149587>
- Solis-Ortiz, S., Ramos, J., Arce, C., Guevara, M.A., Corsi-Cabrera, M., 1994. Eeg oscillations during menstrual cycle. *Int. J. Neurosci.* 76, 279–292.  
<https://doi.org/10.3109/00207459408986010>
- Speelman, C.P., McGann, M., 2013. How mean is the mean? *Front. Psychol.* 4, 1–12.  
<https://doi.org/10.3389/fpsyg.2013.00451>
- Spreng, R.N., Sepulcre, J., Turner, G.R., Stevens, W.D., Schacter, D.L., 2013. Intrinsic Architecture Underlying the Relations among the Default, Dorsal Attention, and Frontoparietal Control Networks of the Human Brain. *J. Cogn. Neurosci.* 25, 74–86.  
[https://doi.org/10.1162/jocn\\_a\\_00281](https://doi.org/10.1162/jocn_a_00281)
- Steriade, M., 2006. Grouping of brain rhythms in corticothalamic systems. *Neuroscience* 137, 1087–1106. <https://doi.org/10.1016/j.neuroscience.2005.10.029>
- Thompson, G.J., 2018. Neural and metabolic basis of dynamic resting state fMRI. *Neuroimage* 180, 448–462. <https://doi.org/10.1016/j.neuroimage.2017.09.010>
- Tibshirani, R., 2011. Regression shrinkage and selection via the lasso: a retrospective. *J. R. Stat. Soc. Ser. B (Statistical Methodol.* 73, 273–282. <https://doi.org/10.1111/j.1467-9868.2011.00771.x>
- Tomasi, D., Volkow, N.D., 2012. Aging and functional brain networks. *Mol. Psychiatry* 17, 549–558. <https://doi.org/10.1038/mp.2011.81>
- Tsvetanov, K.A., Henson, R.N.A., Tyler, L.K., Davis, S.W., Shafto, M.A., Taylor, J.R., Williams, N., Cam-Can, Rowe, J.B., 2015. The effect of ageing on fMRI: Correction for the confounding effects of vascular reactivity evaluated by joint fMRI and MEG in 335 adults. *Hum. Brain Mapp.* 36, 2248–2269. <https://doi.org/10.1002/hbm.22768>
- Vaillancourt, D.E., Newell, K.M., 2002. Changing complexity in human behavior and physiology through aging and disease. *Neurobiol Aging* 23, 1–11.  
[https://doi.org/10.1016/S0197-4580\(02\)00052-0](https://doi.org/10.1016/S0197-4580(02)00052-0)
- Veldhuizen, R.J., Jonkman, E.J., Poortvliet, D.C.J., 1993. Sex differences in age regression parameters of healthy adults-normative data and practical implications. *Electroencephalogr. Clin. Neurophysiol.* 86, 377–384. [https://doi.org/10.1016/0013-4694\(93\)90133-G](https://doi.org/10.1016/0013-4694(93)90133-G)
- Villringer, A., Dirnagl, U., 1995. Coupling of brain activity and cerebral blood flow: basis of functional neuroimaging. *Cerebrovasc. Brain Metab. Rev.* 7, 240–276.
- Vlahou, E.L., Thurm, F., Kolassa, I.-T., Schlee, W., 2015. Resting-state slow wave power, healthy aging and cognitive performance. *Sci. Rep.* 4, 5101.

<https://doi.org/10.1038/srep05101>

- Wang, R., Foniok, T., Wamsteeker, J.I., Qiao, M., Tomanek, B., Vivanco, R.A., Tuor, U.I., 2006. Transient blood pressure changes affect the functional magnetic resonance imaging detection of cerebral activation. *Neuroimage* 31, 1–11.  
<https://doi.org/10.1016/j.neuroimage.2005.12.004>
- Witten, D.M., Tibshirani, R., Hastie, T., 2009. A penalized matrix decomposition, with applications to sparse principal components and canonical correlation analysis. *Biostatistics* 10, 515–534. <https://doi.org/10.1093/biostatistics/kxp008>
- Yang, A.C., Huang, C.C., Yeh, H.L., Liu, M.E., Hong, C.J., Tu, P.C., Chen, J.F., Huang, N.E., Peng, C.K., Lin, C.P., Tsai, S.J., 2013. Complexity of spontaneous BOLD activity in default mode network is correlated with cognitive function in normal male elderly: A multiscale entropy analysis. *Neurobiol. Aging* 34, 428–438.  
<https://doi.org/10.1016/j.neurobiolaging.2012.05.004>
- Zappasodi, F., Marzetti, L., Olejarczyk, E., Tecchio, F., Pizzella, V., 2015. Age-related changes in electroencephalographic signal complexity. *PLoS One* 10, 1–13.  
<https://doi.org/10.1371/journal.pone.0141995>
- Zappasodi, F., Pasqualetti, P., Tombini, M., Ercolani, M., Pizzella, V., Rossini, P.M., Tecchio, F., 2006. Hand cortical representation at rest and during activation: Gender and age effects in the two hemispheres. *Clin. Neurophysiol.* 117, 1518–1528.  
<https://doi.org/10.1016/j.clinph.2006.03.016>
- Zöllner, D., Schaer, M., Scariati, E., Padula, M.C., Eliez, S., Van De Ville, D., 2017. Disentangling resting-state BOLD variability and PCC functional connectivity in 22q11.2 deletion syndrome. *Neuroimage* 149, 85–97.  
<https://doi.org/10.1016/j.neuroimage.2017.01.064>
- Zuo, X.N., Di Martino, A., Kelly, C., Shehzad, Z.E., Gee, D.G., Klein, D.F., Castellanos, F.X., Biswal, B.B., Milham, M.P., 2010. The oscillating brain: Complex and reliable. *Neuroimage* 49, 1432–1445. <https://doi.org/10.1016/j.neuroimage.2009.09.037>

## 10. Supplementary Material

**Supplementary Figure 1.** Flowchart of selecting participants from the Mind-Brain-Body study.

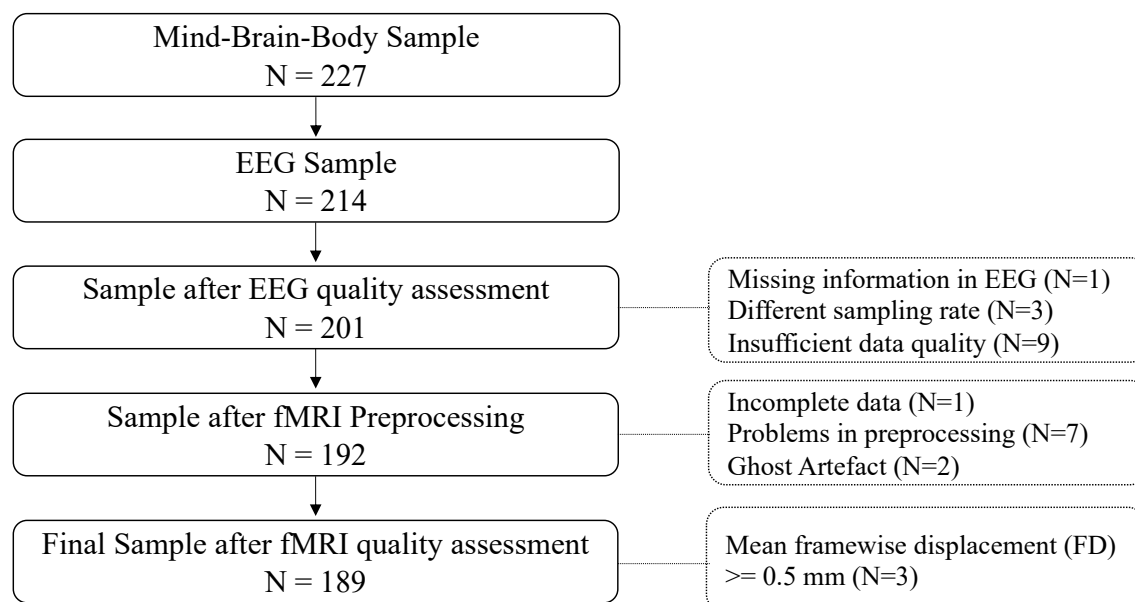

**Supplementary Figure 2.** Scatter plots showing the distribution of F-values and p-values for the main effect of age group (upper row) and sex (lower row), derived from 2x2 ANOVAs on the brain signal variability values in 96 regions-of-interest (Harvard-Oxford anatomical atlas; Desikan et al., 2006). While x-axes show the F-values for the main effect of age-group, y-axes show the corresponding p-values, corrected for multiple comparisons by false discovery rates(FDR; Benjamini and Hochberg, 1995).

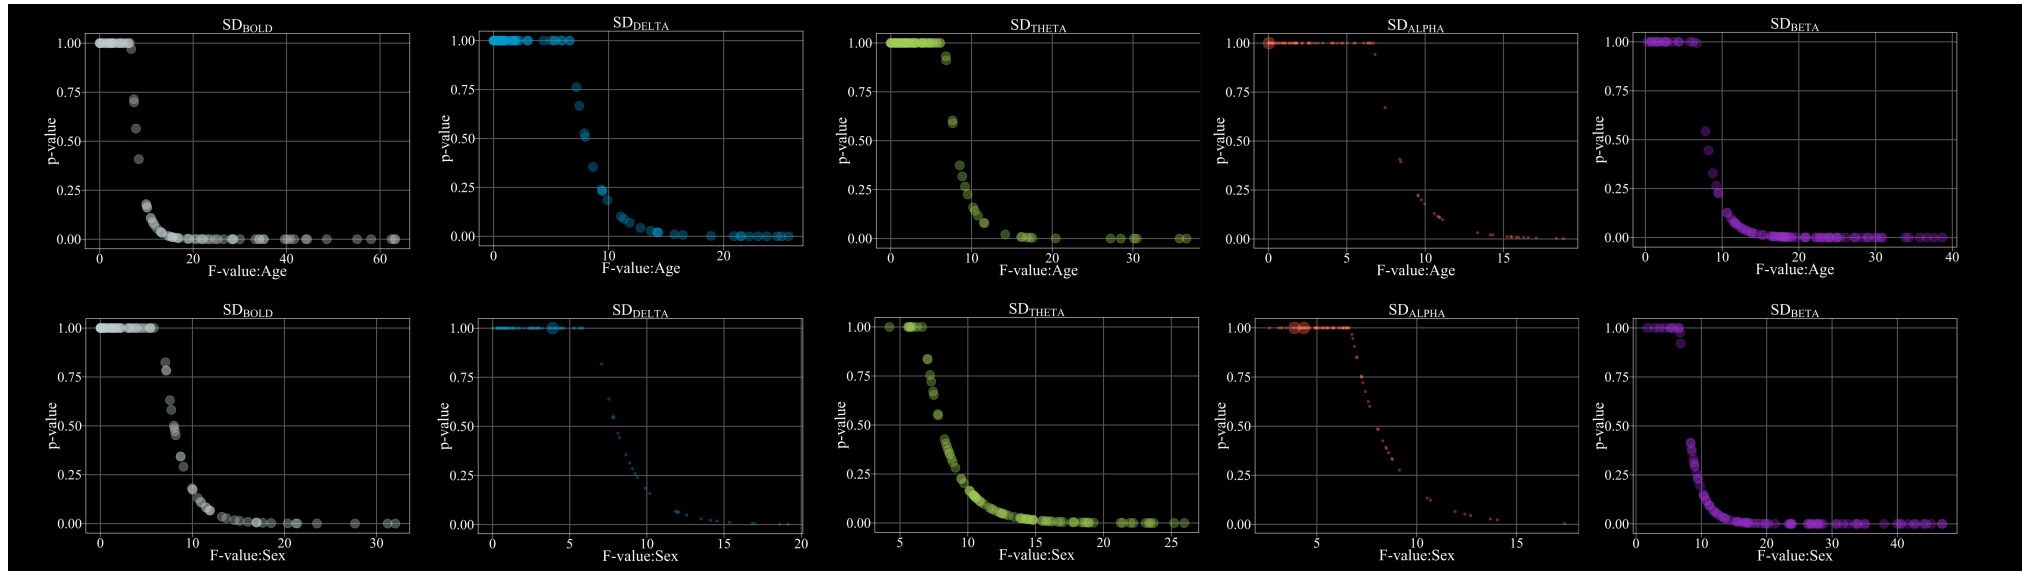

**Supplementary Figure 3.** Number of brain regions in which brain signal variability as measured by rsfMRI or rsEEG (delta: 1–3 Hz, theta: 4–8 Hz, alpha: 8–12 Hz, beta:15–25 Hz) differed significantly depending on age and sex: 96 region of interests (ROIs), 2x2 ANOVA, corrected for multiple comparisons by false discovery rate (FDR; Benjamini and Hochberg, 1995). Group differences were further examined by Tukey HSD post hoc comparisons. The boxplots show Tukey’s post-hoc test results for the differences in brain signal variability measures between age groups (A), and sex (B) respectively.

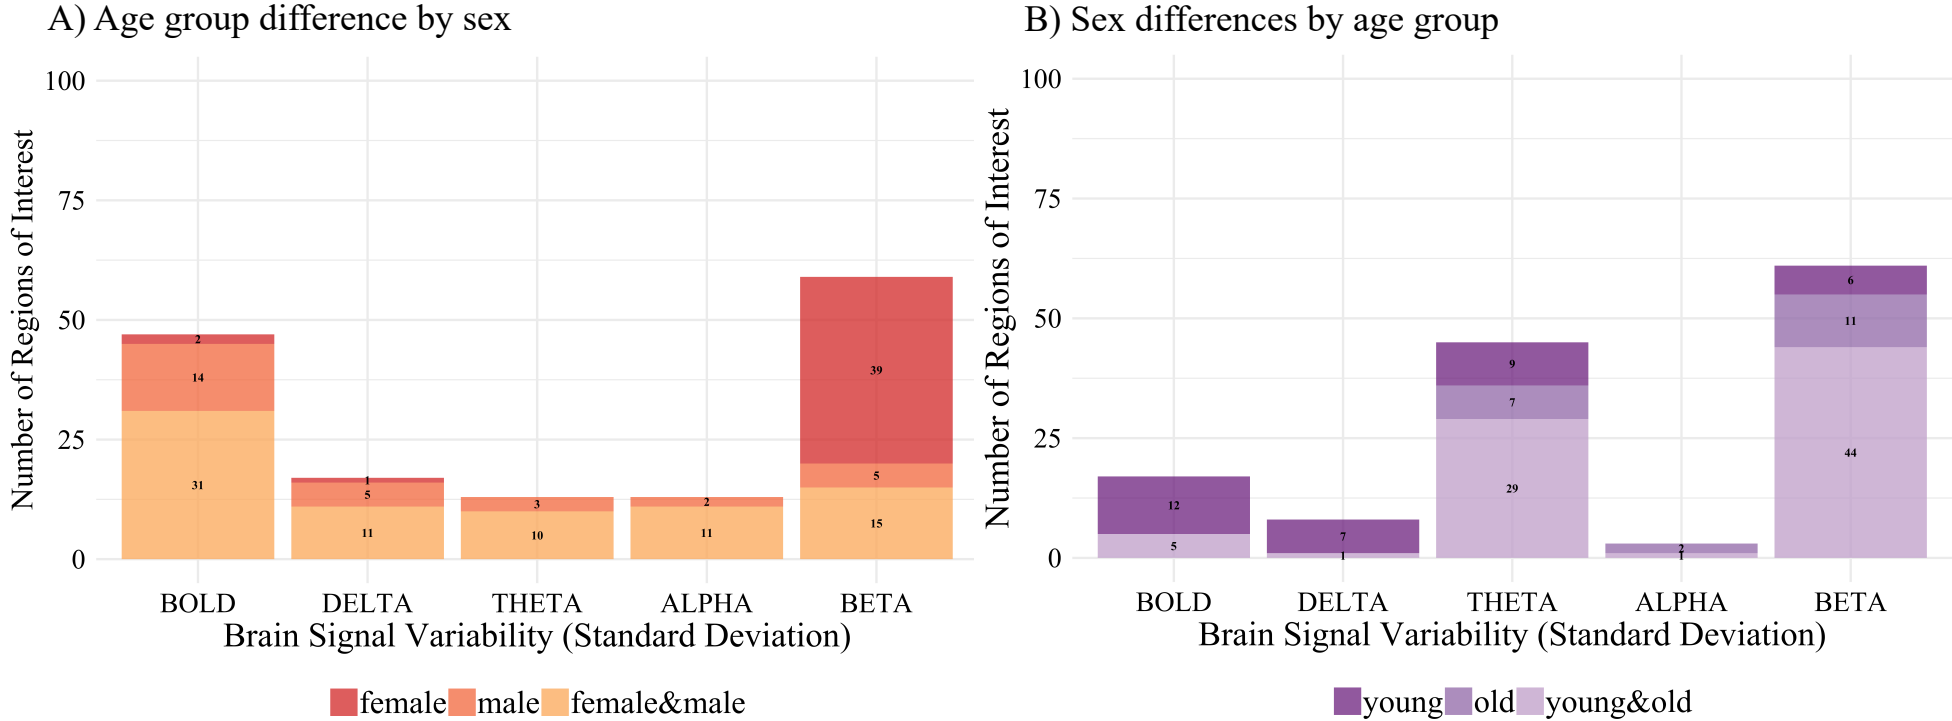

**Supplementary Table 1.** Table showing the F-values for the main effect of age group (left) and sex (right) for BOLD signal variability ( $SD_{BOLD}$ ). Statistical significance was determined using 2x2 ANOVAs corrected for multiple comparisons by false discovery rates (FDR; Benjamini and Hochberg, 1995).

| <b>ROI</b>                                                                | <b>F-value:<br/>age</b> | <b>ROI</b>                                    | <b>F-value:<br/>sex</b> |
|---------------------------------------------------------------------------|-------------------------|-----------------------------------------------|-------------------------|
| Left Cingulate Gyrus anterior division                                    | 48.615                  | Left Frontal Operculum Cortex                 | 13.695                  |
| Left Cingulate Gyrus posterior division                                   | 20.389                  | Left Frontal Pole                             | 21.401                  |
| Left Frontal Orbital Cortex                                               | 28.551                  | Left Inferior Frontal Gyrus pars opercularis  | 16.935                  |
| Left Frontal Pole                                                         | 34.085                  | Left Inferior Frontal Gyrus pars triangularis | 23.529                  |
| Left Inferior Frontal Gyrus pars opercularis                              | 41.622                  | Left Insular Cortex                           | 13.187                  |
| Left Inferior Frontal Gyrus pars triangularis                             | 14.852                  | Left Middle Frontal Gyrus                     | 32.036                  |
| Left Inferior Temporal Gyrus posterior division                           | 25.290                  | Left Occipital Fusiform Gyrus                 | 17.001                  |
| Left Insular Cortex                                                       | 58.085                  | Left Planum Temporale                         | 18.550                  |
| Left Intracalcarine Cortex                                                | 30.026                  | Left Precuneous Cortex                        | 27.658                  |
| Left Juxtapositional Lobule Cortex formerly<br>Supplementary Motor Cortex | 40.124                  | Right Frontal Operculum Cortex                | 17.626                  |
| Left Middle Frontal Gyrus                                                 | 19.113                  | Right Frontal Pole                            | 16.021                  |
| Left Occipital Fusiform Gyrus                                             | 34.200                  | Right Middle Frontal Gyrus                    | 15.123                  |
| Left Occipital Pole                                                       | 23.057                  | Right Middle Temporal Gyrus anterior division | 16.937                  |
| Left Paracingulate Gyrus                                                  | 62.433                  | Right Occipital Fusiform Gyrus                | 14.597                  |
| Left Parahippocampal Gyrus anterior division                              | 28.623                  | Right Occipital Pole                          | 21.222                  |
| Left Parahippocampal Gyrus posterior division                             | 16.951                  | Right Precuneous Cortex                       | 31.206                  |
| Left Postcentral Gyrus                                                    | 15.551                  | Right Superior Frontal Gyrus                  | 20.345                  |
| Left Subcallosal Cortex                                                   | 22.227                  |                                               |                         |
| Left Superior Frontal Gyrus                                               | 13.411                  |                                               |                         |
| Left Supracalcarine Cortex                                                | 15.271                  |                                               |                         |
| Left Supramarginal Gyrus anterior division                                | 19.024                  |                                               |                         |
| Left Temporal Fusiform Cortex posterior division                          | 16.808                  |                                               |                         |

|                                                                            |        |
|----------------------------------------------------------------------------|--------|
| Left Temporal Occipital Fusiform Cortex                                    | 55.093 |
| Right Cingulate Gyrus anterior division                                    | 44.117 |
| Right Cingulate Gyrus posterior division                                   | 21.659 |
| Right Frontal Medial Cortex                                                | 39.596 |
| Right Frontal Orbital Cortex                                               | 63.259 |
| Right Frontal Pole                                                         | 44.426 |
| Right Inferior Frontal Gyrus pars triangularis                             | 13.015 |
| Right Inferior Temporal Gyrus anterior division                            | 23.696 |
| Right Inferior Temporal Gyrus posterior division                           | 18.688 |
| Right Insular Cortex                                                       | 15.497 |
| Right Juxtapositional Lobule Cortex formerly<br>Supplementary Motor Cortex | 26.559 |
| Right Lateral Occipital Cortex inferior division                           | 28.214 |
| Right Middle Temporal Gyrus anterior division                              | 33.323 |
| Right Occipital Fusiform Gyrus                                             | 35.136 |
| Right Occipital Pole                                                       | 40.811 |
| Right Paracingulate Gyrus                                                  | 28.450 |
| Right Parahippocampal Gyrus anterior division                              | 14.644 |
| Right Planum Polare                                                        | 63.030 |
| Right Planum Temporale                                                     | 15.649 |
| Right Postcentral Gyrus                                                    | 20.781 |
| Right Subcallosal Cortex                                                   | 35.103 |
| Right Superior Parietal Lobule                                             | 24.682 |
| Right Superior Temporal Gyrus anterior division                            | 13.131 |
| Right Supracalcarine Cortex                                                | 16.332 |
| Right Supramarginal Gyrus anterior division                                | 21.994 |
| Right Temporal Fusiform Cortex anterior division                           | 16.711 |
| Right Temporal Occipital Fusiform Cortex                                   | 13.253 |

---



**Supplementary Table 2.** Table showing the F-values for the main effect of age group (left) and sex (right) for EEG signal variability ( $SD_{\Delta}$ ). Statistical significance was determined using 2x2 ANOVAs corrected for multiple comparisons by false discovery rates (FDR; Benjamini and Hochberg, 1995).

| <b>ROI</b>                                                              | <b>F value:<br/>age</b> | <b>ROI</b>                                       | <b>F value:<br/>sex</b> |
|-------------------------------------------------------------------------|-------------------------|--------------------------------------------------|-------------------------|
| Left Cingulate Gyrus posterior division                                 | 21.535                  | Left Cuneal Cortex                               | 14.114                  |
| Left Cuneal Cortex                                                      | 24.636                  | Left Intracalcarine Cortex                       | 15.355                  |
| Left Intracalcarine Cortex                                              | 16.454                  | Left Supracalcarine Cortex                       | 16.818                  |
| Left Juxtapositional Lobule Cortex formerly Supplementary Motor Cortex  | 14.326                  | Right Cuneal Cortex                              | 16.985                  |
| Left Lateral Occipital Cortex superior division                         | 13.663                  | Right Intracalcarine Cortex                      | 18.605                  |
| Left Precuneous Cortex                                                  | 20.890                  | Right Lateral Occipital Cortex inferior division | 14.544                  |
| Left Supracalcarine Cortex                                              | 22.222                  | Right Lingual Gyrus                              | 12.575                  |
| Right Cingulate Gyrus posterior division                                | 22.989                  | Right Supracalcarine Cortex                      | 19.167                  |
| Right Cuneal Cortex                                                     | 25.640                  | Right Temporal Occipital Fusiform Cortex         | 13.512                  |
| Right Intracalcarine Cortex                                             | 21.456                  |                                                  |                         |
| Right Juxtapositional Lobule Cortex formerly Supplementary Motor Cortex | 15.721                  |                                                  |                         |
| Right Lateral Occipital Cortex inferior division                        | 14.275                  |                                                  |                         |
| Right Lateral Occipital Cortex superior division                        | 18.901                  |                                                  |                         |
| Right Occipital Pole                                                    | 14.197                  |                                                  |                         |
| Right Precuneous Cortex                                                 | 23.734                  |                                                  |                         |
| Right Superior Frontal Gyrus                                            | 12.769                  |                                                  |                         |
| Right Supracalcarine Cortex                                             | 25.020                  |                                                  |                         |

**Supplementary Table 3.** Table showing the F-values for the main effect of age group (left) and sex (right) for EEG signal variability ( $SD_{\text{THETA}}$ ). Statistical significance was determined using 2x2 ANOVAs corrected for multiple comparisons by false discovery rates (FDR; Benjamini and Hochberg, 1995).

| ROI                                                                        | F-value:<br>age | ROI                                                                       | F-value:<br>sex |
|----------------------------------------------------------------------------|-----------------|---------------------------------------------------------------------------|-----------------|
| Left Cingulate Gyrus anterior division                                     | 28.485          | Left Angular Gyrus                                                        | 12.752          |
| Left Cingulate Gyrus posterior division                                    | 16.852          | Left Cingulate Gyrus posterior division                                   | 17.834          |
| Left Juxtapositional Lobule Cortex formerly<br>Supplementary Motor Cortex  | 35.755          | Left Cuneal Cortex                                                        | 21.253          |
| Left Middle Frontal Gyrus                                                  | 17.237          | Left Inferior Temporal Gyrus posterior division                           | 13.007          |
| Left Paracingulate Gyrus                                                   | 16.139          | Left Inferior Temporal Gyrus temporooccipital part                        | 13.842          |
| Left Superior Frontal Gyrus                                                | 30.468          | Left Intracalcarine Cortex                                                | 23.104          |
| Right Cingulate Gyrus anterior division                                    | 27.225          | Left Juxtapositional Lobule Cortex formerly<br>Supplementary Motor Cortex | 14.819          |
| Right Cingulate Gyrus posterior division                                   | 17.526          | Left Lateral Occipital Cortex inferior division                           | 13.942          |
| Right Juxtapositional Lobule Cortex formerly<br>Supplementary Motor Cortex | 36.622          | Left Lingual Gyrus                                                        | 18.89           |
| Right Middle Frontal Gyrus                                                 | 20.439          | Left Middle Temporal Gyrus temporooccipital part                          | 14.08           |
| Right Paracingulate Gyrus                                                  | 14.178          | Left Occipital Fusiform Gyrus                                             | 14.779          |
| Right Precentral Gyrus                                                     | 16.266          | Left Occipital Pole                                                       | 17.024          |
| Right Superior Frontal Gyrus                                               | 30.123          | Left Parahippocampal Gyrus posterior division                             | 12.582          |
|                                                                            |                 | Left Parietal Operculum Cortex                                            | 18.352          |
|                                                                            |                 | Left Planum Temporale                                                     | 16.806          |
|                                                                            |                 | Left Postcentral Gyrus                                                    | 16.214          |
|                                                                            |                 | Left Precentral Gyrus                                                     | 16.055          |
|                                                                            |                 | Left Precuneous Cortex                                                    | 17.811          |
|                                                                            |                 | Left Supracalcarine Cortex                                                | 23.691          |
|                                                                            |                 | Left Supramarginal Gyrus anterior division                                | 18.926          |

|                                                                            |        |
|----------------------------------------------------------------------------|--------|
| Left Supramarginal Gyrus posterior division                                | 13.417 |
| Left Temporal Occipital Fusiform Cortex                                    | 15.509 |
| Right Central Opercular Cortex                                             | 14.245 |
| Right Cingulate Gyrus posterior division                                   | 16.628 |
| Right Cuneal Cortex                                                        | 21.429 |
| Right Frontal Operculum Cortex                                             | 23.344 |
| Right Frontal Orbital Cortex                                               | 14.445 |
| Right Inferior Frontal Gyrus pars opercularis                              | 25.208 |
| Right Inferior Frontal Gyrus pars triangularis                             | 25.954 |
| Right Inferior Temporal Gyrus temporooccipital part                        | 14.395 |
| Right Insular Cortex                                                       | 14.807 |
| Right Intracalcarine Cortex                                                | 22.191 |
| Right Juxtapositional Lobule Cortex formerly<br>Supplementary Motor Cortex | 14.315 |
| Right Lateral Occipital Cortex inferior division                           | 19.27  |
| Right Lateral Occipital Cortex superior division                           | 12.508 |
| Right Lingual Gyrus                                                        | 18.709 |
| Right Middle Frontal Gyrus                                                 | 14.549 |
| Right Middle Temporal Gyrus temporooccipital part                          | 14.787 |
| Right Occipital Fusiform Gyrus                                             | 17.696 |
| Right Occipital Pole                                                       | 21.974 |
| Right Postcentral Gyrus                                                    | 15.479 |
| Right Precentral Gyrus                                                     | 18.576 |
| Right Precuneous Cortex                                                    | 15.741 |
| Right Supracalcarine Cortex                                                | 23.478 |
| Right Supramarginal Gyrus anterior division                                | 13.914 |
| Right Temporal Occipital Fusiform Cortex                                   | 15.857 |

---

**Supplementary Table 4:** Table showing the F-values for the main effect of age group (left) and sex (right) for EEG signal variability ( $SD_{ALPHA}$ ). Statistical significance was determined using 2x2 ANOVAs corrected for multiple comparisons by false discovery rates (FDR; Benjamini and Hochberg, 1995).

| <b>ROI</b>                                                              | <b>F-value:<br/>age</b> | <b>ROI</b>                                     | <b>F-value:<br/>sex</b> |
|-------------------------------------------------------------------------|-------------------------|------------------------------------------------|-------------------------|
| Left Cingulate Gyrus posterior division                                 | 15.519                  | Left Frontal Pole                              | 14.036                  |
| Left Cuneal Cortex                                                      | 17.085                  | Right Frontal Pole                             | 13.691                  |
| Left Juxtapositional Lobule Cortex formerly Supplementary Motor Cortex  | 14.159                  | Right Inferior Frontal Gyrus pars opercularis  | 12.692                  |
| Left Precuneous Cortex                                                  | 14.320                  | Right Inferior Frontal Gyrus pars triangularis | 17.399                  |
| Left Supracalcarine Cortex                                              | 16.292                  |                                                |                         |
| Right Cingulate Gyrus posterior division                                | 15.481                  |                                                |                         |
| Right Cuneal Cortex                                                     | 18.827                  |                                                |                         |
| Right Intracalcarine Cortex                                             | 16.574                  |                                                |                         |
| Right Juxtapositional Lobule Cortex formerly Supplementary Motor Cortex | 13.353                  |                                                |                         |
| Right Lateral Occipital Cortex superior division                        | 15.251                  |                                                |                         |
| Right Occipital Pole                                                    | 15.986                  |                                                |                         |
| Right Precuneous Cortex                                                 | 15.817                  |                                                |                         |
| Right Supracalcarine Cortex                                             | 18.376                  |                                                |                         |

**Supplementary Table 5:** Table showing the F-values for the main effect of age group (left) and sex (right) for EEG signal variability ( $SD_{BETA}$ ). Statistical significance was determined using 2x2 ANOVAs corrected for multiple comparisons by false discovery rates (FDR; Benjamini and Hochberg, 1995).

| <b>ROI</b>                                         | <b>F-value:<br/>age</b> | <b>ROI</b>                                         | <b>F-value:<br/>sex</b> |
|----------------------------------------------------|-------------------------|----------------------------------------------------|-------------------------|
| Left Angular Gyrus                                 | 33.889                  | Left Angular Gyrus                                 | 27.94                   |
| Left Central Opercular Cortex                      | 29.092                  | Left Cingulate Gyrus posterior division            | 27.591                  |
| Left Cingulate Gyrus posterior division            | 14.001                  | Left Cuneal Cortex                                 | 44.014                  |
| Left Frontal Medial Cortex                         | 20.640                  | Left Frontal Medial Cortex                         | 26.259                  |
| Left Frontal Operculum Cortex                      | 13.810                  | Left Frontal Orbital Cortex                        | 16.42                   |
| Left Frontal Orbital Cortex                        | 16.708                  | Left Frontal Pole                                  | 15.711                  |
| Left Frontal Pole                                  | 17.605                  | Left Heschls Gyrus includes H1 and H2              | 18.317                  |
| Left Heschls Gyrus includes H1 and H2              | 35.760                  | Left Inferior Temporal Gyrus posterior division    | 18.946                  |
| Left Inferior Frontal Gyrus pars opercularis       | 16.834                  | Left Inferior Temporal Gyrus temporooccipital part | 28.281                  |
| Left Inferior Frontal Gyrus pars triangularis      | 12.733                  | Left Intracalcarine Cortex                         | 45.176                  |
| Left Inferior Temporal Gyrus anterior division     | 17.838                  | Left Lateral Occipital Cortex inferior division    | 32.363                  |
| Left Inferior Temporal Gyrus posterior division    | 30.217                  | Left Lateral Occipital Cortex superior division    | 28.676                  |
| Left Inferior Temporal Gyrus temporooccipital part | 15.195                  | Left Lingual Gyrus                                 | 42.538                  |
| Left Insular Cortex                                | 25.333                  | Left Middle Temporal Gyrus posterior division      | 13.19                   |
| Left Middle Frontal Gyrus                          | 18.560                  | Left Middle Temporal Gyrus temporooccipital part   | 23.922                  |
| Left Middle Temporal Gyrus anterior division       | 18.218                  | Left Occipital Fusiform Gyrus                      | 33.962                  |
| Left Middle Temporal Gyrus posterior division      | 28.902                  | Left Occipital Pole                                | 41.701                  |
| Left Middle Temporal Gyrus temporooccipital part   | 23.834                  | Left Paracingulate Gyrus                           | 14.425                  |
| Left Paracingulate Gyrus                           | 13.773                  | Left Parahippocampal Gyrus anterior division       | 23.759                  |
| Left Parahippocampal Gyrus anterior division       | 19.654                  | Left Parahippocampal Gyrus posterior division      | 33.883                  |
| Left Parietal Operculum Cortex                     | 37.639                  | Left Parietal Operculum Cortex                     | 21.278                  |
| Left Planum Polare                                 | 24.914                  | Left Planum Temporale                              | 23.662                  |

|                                                  |        |
|--------------------------------------------------|--------|
| Left Planum Temporale                            | 38.708 |
| Left Postcentral Gyrus                           | 29.919 |
| Left Precentral Gyrus                            | 24.920 |
| Left Subcallosal Cortex                          | 18.873 |
| Left Superior Parietal Lobule                    | 20.882 |
| Left Superior Temporal Gyrus anterior division   | 20.881 |
| Left Superior Temporal Gyrus posterior division  | 30.706 |
| Left Supramarginal Gyrus anterior division       | 34.328 |
| Left Supramarginal Gyrus posterior division      | 36.668 |
| Left Temporal Fusiform Cortex anterior division  | 18.248 |
| Left Temporal Fusiform Cortex posterior division | 23.363 |
| Left Temporal Pole                               | 17.297 |
| Right Central Opercular Cortex                   | 30.886 |
| Right Cingulate Gyrus anterior division          | 12.714 |
| Right Cingulate Gyrus posterior division         | 13.216 |
| Right Frontal Medial Cortex                      | 22.281 |
| Right Frontal Orbital Cortex                     | 17.829 |
| Right Frontal Pole                               | 14.471 |
| Right Heschls Gyrus includes H1 and H2           | 23.901 |
| Right Inferior Frontal Gyrus pars opercularis    | 13.248 |
| Right Inferior Temporal Gyrus anterior division  | 17.982 |
| Right Inferior Temporal Gyrus posterior division | 16.913 |
| Right Insular Cortex                             | 23.181 |
| Right Middle Frontal Gyrus                       | 16.461 |
| Right Middle Temporal Gyrus anterior division    | 22.190 |
| Right Middle Temporal Gyrus posterior division   | 22.708 |

|                                                     |        |
|-----------------------------------------------------|--------|
| Left Postcentral Gyrus                              | 13.534 |
| Left Precuneous Cortex                              | 33.556 |
| Left Subcallosal Cortex                             | 23.546 |
| Left Superior Parietal Lobule                       | 17.175 |
| Left Superior Temporal Gyrus posterior division     | 12.733 |
| Left Supracalcarine Cortex                          | 46.791 |
| Left Supramarginal Gyrus anterior division          | 15.331 |
| Left Supramarginal Gyrus posterior division         | 23.282 |
| Left Temporal Fusiform Cortex anterior division     | 17.685 |
| Left Temporal Fusiform Cortex posterior division    | 27.478 |
| Left Temporal Occipital Fusiform Cortex             | 34.95  |
| Left Temporal Pole                                  | 13.448 |
| Right Angular Gyrus                                 | 26.753 |
| Right Cingulate Gyrus posterior division            | 27.907 |
| Right Cuneal Cortex                                 | 40.424 |
| Right Frontal Medial Cortex                         | 26.339 |
| Right Frontal Orbital Cortex                        | 15.318 |
| Right Frontal Pole                                  | 15.657 |
| Right Inferior Temporal Gyrus temporooccipital part | 31.698 |
| Right Intracalcarine Cortex                         | 40.575 |
| Right Lateral Occipital Cortex inferior division    | 44.382 |
| Right Lateral Occipital Cortex superior division    | 26.79  |
| Right Lingual Gyrus                                 | 39.961 |
| Right Middle Temporal Gyrus temporooccipital part   | 30.557 |
| Right Occipital Fusiform Gyrus                      | 37.958 |
| Right Occipital Pole                                | 46.91  |

|                                                  |        |
|--------------------------------------------------|--------|
| Right Paracingulate Gyrus                        | 15.398 |
| Right Parahippocampal Gyrus anterior division    | 18.606 |
| Right Parietal Operculum Cortex                  | 27.257 |
| Right Planum Polare                              | 24.096 |
| Right Planum Temporale                           | 26.151 |
| Right Postcentral Gyrus                          | 24.073 |
| Right Precentral Gyrus                           | 22.804 |
| Right Subcallosal Cortex                         | 20.934 |
| Right Superior Parietal Lobule                   | 17.571 |
| Right Superior Temporal Gyrus anterior division  | 27.364 |
| Right Superior Temporal Gyrus posterior division | 28.260 |
| Right Supramarginal Gyrus anterior division      | 24.980 |
| Right Supramarginal Gyrus posterior division     | 16.383 |
| Right Temporal Fusiform Cortex anterior division | 18.007 |
| Right Temporal Pole                              | 19.108 |

---

|                                                   |        |
|---------------------------------------------------|--------|
| Right Paracingulate Gyrus                         | 16.984 |
| Right Parahippocampal Gyrus anterior division     | 19.682 |
| Right Parahippocampal Gyrus posterior division    | 26.839 |
| Right Parietal Operculum Cortex                   | 16.684 |
| Right Planum Temporale                            | 17.16  |
| Right Precuneous Cortex                           | 30.788 |
| Right Subcallosal Cortex                          | 23.739 |
| Right Superior Parietal Lobule                    | 13.833 |
| Right Supracalcarine Cortex                       | 42.859 |
| Right Supramarginal Gyrus posterior division      | 20.224 |
| Right Temporal Fusiform Cortex anterior division  | 16.612 |
| Right Temporal Fusiform Cortex posterior division | 19.912 |
| Right Temporal Occipital Fusiform Cortex          | 35.103 |

---



**Supplementary Table 6.** Spearman correlation of  $SD_{BOLD}$  with  $SD_{EEG}$  for each frequency band in young subjects (N=135). None of the pairwise correlations between  $SD_{BOLD}$  and  $SD_{EEG}$  were statistically significant.

| ROI                                                                         | rho<br>$SD_{\Delta}$ | rho<br>$SD_{\theta}$ | rho<br>$SD_{\alpha}$ | rho<br>$SD_{\beta}$ |
|-----------------------------------------------------------------------------|----------------------|----------------------|----------------------|---------------------|
| Left Angular Gyrus                                                          | 0.005                | 0.015                | 0.014                | 0.071               |
| Left Central Opercular Cortex                                               | 0.037                | 0.001                | 0.076                | 0.034               |
| Left Cingulate Gyrus, anterior division                                     | -0.090               | -0.077               | 0.091                | -0.028              |
| Left Cingulate Gyrus, posterior division                                    | -0.096               | -0.048               | -0.018               | 0.042               |
| Left Cuneal Cortex                                                          | -0.166               | -0.153               | -0.040               | -0.055              |
| Left Frontal Medial Cortex                                                  | -0.009               | -0.083               | -0.105               | -0.100              |
| Left Frontal Operculum Cortex                                               | -0.067               | -0.128               | 0.074                | -0.094              |
| Left Frontal Orbital Cortex                                                 | 0.035                | -0.010               | 0.137                | 0.107               |
| Left Frontal Pole                                                           | 0.110                | -0.018               | -0.029               | -0.052              |
| Left Heschl's Gyrus (includes H1 and H2)                                    | -0.019               | 0.029                | 0.112                | -0.096              |
| Left Inferior Frontal Gyrus, pars opercularis                               | 0.040                | -0.082               | 0.063                | -0.091              |
| Left Inferior Frontal Gyrus, pars triangularis                              | 0.031                | -0.114               | 0.064                | -0.041              |
| Left Inferior Temporal Gyrus, anterior division                             | 0.035                | 0.023                | 0.099                | 0.012               |
| Left Inferior Temporal Gyrus, posterior division                            | 0.047                | 0.078                | 0.116                | 0.034               |
| Left Inferior Temporal Gyrus, temporooccipital part                         | 0.030                | -0.002               | 0.025                | -0.089              |
| Left Insular Cortex                                                         | 0.023                | -0.134               | -0.017               | -0.077              |
| Left Intracalcarine Cortex                                                  | 0.018                | 0.028                | 0.072                | 0.032               |
| Left Juxtapositional Lobule Cortex (formerly<br>Supplementary Motor Cortex) | -0.050               | -0.099               | 0.077                | 0.022               |
| Left Lateral Occipital Cortex, inferior division                            | -0.048               | -0.030               | -0.078               | -0.077              |
| Left Lateral Occipital Cortex, superior division                            | -0.062               | -0.081               | 0.018                | -0.088              |
| Left Lingual Gyrus                                                          | 0.131                | 0.060                | -0.022               | -0.035              |
| Left Middle Frontal Gyrus                                                   | 0.041                | -0.066               | 0.131                | 0.015               |
| Left Middle Temporal Gyrus, anterior division                               | 0.004                | -0.063               | -0.014               | -0.173              |
| Left Middle Temporal Gyrus, posterior division                              | 0.115                | 0.005                | -0.041               | -0.029              |
| Left Middle Temporal Gyrus, temporooccipital part                           | 0.072                | 0.037                | 0.071                | -0.092              |
| Left Occipital Fusiform Gyrus                                               | 0.146                | 0.149                | 0.115                | 0.026               |
| Left Occipital Pole                                                         | -0.017               | 0.052                | 0.036                | 0.035               |
| Left Paracingulate Gyrus                                                    | -0.044               | -0.087               | -0.012               | -0.036              |
| Left Parahippocampal Gyrus, anterior division                               | 0.024                | 0.021                | 0.121                | 0.027               |
| Left Parahippocampal Gyrus, posterior division                              | -0.086               | 0.030                | 0.117                | 0.162               |
| Left Parietal Operculum Cortex                                              | -0.130               | -0.064               | 0.039                | -0.110              |
| Left Planum Polare                                                          | 0.030                | 0.018                | 0.073                | -0.004              |
| Left Planum Temporale                                                       | -0.066               | 0.009                | 0.120                | -0.071              |
| Left Postcentral Gyrus                                                      | -0.019               | -0.032               | 0.139                | -0.060              |
| Left Precentral Gyrus                                                       | -0.015               | -0.074               | 0.091                | -0.056              |
| Left Precuneous Cortex                                                      | -0.029               | -0.070               | 0.107                | -0.044              |

|                                                                           |        |        |        |        |
|---------------------------------------------------------------------------|--------|--------|--------|--------|
| Left Subcallosal Cortex                                                   | -0.038 | -0.087 | 0.034  | -0.074 |
| Left Superior Frontal Gyrus                                               | -0.108 | -0.139 | 0.027  | -0.038 |
| Left Superior Parietal Lobule                                             | 0.087  | 0.041  | 0.135  | -0.084 |
| Left Superior Temporal Gyrus, anterior division                           | -0.010 | -0.074 | 0.033  | 0.064  |
| Left Superior Temporal Gyrus, posterior division                          | -0.059 | -0.045 | -0.047 | -0.087 |
| Left Supracalcarine Cortex                                                | -0.076 | -0.071 | 0.036  | 0.016  |
| Left Supramarginal Gyrus, anterior division                               | 0.026  | -0.060 | 0.001  | -0.057 |
| Left Supramarginal Gyrus, posterior division                              | -0.005 | 0.066  | 0.106  | 0.043  |
| Left Temporal Fusiform Cortex, anterior division                          | 0.188  | 0.120  | 0.051  | 0.031  |
| Left Temporal Fusiform Cortex, posterior division                         | 0.056  | 0.052  | 0.144  | 0.075  |
| Left Temporal Occipital Fusiform Cortex                                   | 0.096  | 0.094  | 0.128  | 0.092  |
| Left Temporal Pole                                                        | 0.224  | 0.105  | 0.152  | -0.010 |
| Right Angular Gyrus                                                       | -0.010 | 0.025  | 0.010  | 0.046  |
| Right Central Opercular Cortex                                            | 0.084  | -0.015 | 0.068  | -0.030 |
| Right Cingulate Gyrus, anterior division                                  | -0.079 | -0.085 | 0.062  | -0.046 |
| Right Cingulate Gyrus, posterior division                                 | -0.090 | -0.048 | -0.004 | 0.021  |
| Right Cuneal Cortex                                                       | -0.118 | -0.096 | 0.017  | -0.074 |
| Right Frontal Medial Cortex                                               | 0.042  | -0.043 | 0.063  | -0.050 |
| Right Frontal Operculum Cortex                                            | 0.004  | -0.017 | 0.089  | -0.075 |
| Right Frontal Orbital Cortex                                              | 0.085  | -0.024 | 0.100  | -0.032 |
| Right Frontal Pole                                                        | 0.149  | -0.022 | 0.014  | -0.061 |
| Right Heschl's Gyrus (includes H1 and H2)                                 | -0.085 | -0.045 | 0.065  | -0.071 |
| Right Inferior Frontal Gyrus, pars opercularis                            | -0.020 | -0.029 | 0.127  | -0.138 |
| Right Inferior Frontal Gyrus, pars triangularis                           | -0.047 | -0.092 | 0.061  | -0.170 |
| Right Inferior Temporal Gyrus, anterior division                          | 0.013  | -0.018 | 0.058  | 0.028  |
| Right Inferior Temporal Gyrus, posterior division                         | 0.179  | 0.070  | 0.128  | -0.048 |
| Right Inferior Temporal Gyrus, temporooccipital part                      | 0.106  | 0.068  | 0.177  | 0.093  |
| Right Insular Cortex                                                      | -0.034 | -0.087 | 0.043  | -0.054 |
| Right Intracalcarine Cortex                                               | -0.063 | -0.121 | 0.008  | -0.065 |
| Right Juxtapositional Lobule Cortex (formerly Supplementary Motor Cortex) | -0.040 | -0.142 | 0.015  | -0.049 |
| Right Lateral Occipital Cortex, inferior division                         | -0.025 | 0.005  | 0.081  | 0.026  |
| Right Lateral Occipital Cortex, superior division                         | -0.008 | -0.037 | 0.044  | -0.113 |
| Right Lingual Gyrus                                                       | 0.040  | 0.033  | 0.058  | 0.034  |
| Right Middle Frontal Gyrus                                                | -0.167 | -0.083 | 0.063  | -0.143 |
| Right Middle Temporal Gyrus, anterior division                            | 0.135  | 0.049  | 0.054  | -0.113 |
| Right Middle Temporal Gyrus, posterior division                           | 0.002  | 0.080  | 0.191  | 0.060  |
| Right Middle Temporal Gyrus, temporooccipital part                        | 0.026  | 0.011  | 0.094  | 0.049  |
| Right Occipital Fusiform Gyrus                                            | 0.095  | 0.039  | 0.022  | 0.007  |
| Right Occipital Pole                                                      | 0.019  | -0.050 | 0.025  | -0.036 |
| Right Paracingulate Gyrus                                                 | -0.063 | -0.041 | 0.034  | -0.012 |
| Right Parahippocampal Gyrus, anterior division                            | -0.027 | -0.005 | 0.071  | 0.102  |

|                                                    |        |        |        |        |
|----------------------------------------------------|--------|--------|--------|--------|
| Right Parahippocampal Gyrus, posterior division    | 0.020  | -0.037 | 0.037  | 0.024  |
| Right Parietal Operculum Cortex                    | -0.066 | -0.039 | 0.124  | -0.075 |
| Right Planum Polare                                | 0.186  | 0.073  | 0.105  | -0.021 |
| Right Planum Temporale                             | -0.028 | -0.043 | 0.074  | 0.070  |
| Right Postcentral Gyrus                            | 0.070  | 0.026  | 0.133  | -0.056 |
| Right Precentral Gyrus                             | -0.031 | -0.047 | 0.134  | -0.040 |
| Right Precuneous Cortex                            | -0.099 | -0.145 | 0.053  | -0.200 |
| Right Subcallosal Cortex                           | -0.084 | -0.086 | 0.098  | 0.054  |
| Right Superior Frontal Gyrus                       | -0.100 | -0.158 | -0.026 | -0.116 |
| Right Superior Parietal Lobule                     | -0.035 | -0.067 | 0.080  | -0.103 |
| Right Superior Temporal Gyrus, anterior division   | 0.144  | 0.056  | 0.050  | 0.021  |
| Right Superior Temporal Gyrus, posterior division  | 0.067  | 0.068  | 0.064  | 0.004  |
| Right Supracalcarine Cortex                        | -0.004 | 0.049  | 0.089  | 0.065  |
| Right Supramarginal Gyrus, anterior division       | 0.134  | 0.092  | 0.116  | 0.046  |
| Right Supramarginal Gyrus, posterior division      | 0.058  | 0.055  | 0.096  | 0.052  |
| Right Temporal Fusiform Cortex, anterior division  | 0.038  | -0.019 | 0.013  | 0.142  |
| Right Temporal Fusiform Cortex, posterior division | 0.012  | 0.011  | 0.075  | 0.103  |
| Right Temporal Occipital Fusiform Cortex           | -0.013 | 0.018  | 0.115  | 0.098  |
| Right Temporal Pole                                | 0.135  | 0.006  | 0.044  | -0.129 |

---

*\* $p_{FDR} < 0.05$ ; \*\* $p_{FDR} < 0.01$ ; \*\*\* $p_{FDR} < 0.001$ , 2-tailed*

**Supplementary Table 7.** Spearman correlation of  $SD_{BOLD}$  with  $SD_{EEG}$  for each frequency band in old subjects (N=54). None of the pairwise correlations between  $SD_{BOLD}$  and  $SD_{EEG}$  were statistically significant.

| ROI                                                                         | rho<br>$SD_{DELTA}$ | rho<br>$SD_{THETA}$ | rho<br>$SD_{ALPHA}$ | rho<br>$SD_{BETA}$ |
|-----------------------------------------------------------------------------|---------------------|---------------------|---------------------|--------------------|
| Left Angular Gyrus                                                          | -0.118              | -0.100              | -0.001              | -0.192             |
| Left Central Opercular Cortex                                               | 0.129               | 0.132               | -0.006              | 0.204              |
| Left Cingulate Gyrus, anterior division                                     | -0.043              | 0.175               | -0.034              | 0.010              |
| Left Cingulate Gyrus, posterior division                                    | 0.014               | -0.077              | 0.012               | -0.301             |
| Left Cuneal Cortex                                                          | -0.134              | -0.157              | -0.096              | -0.387             |
| Left Frontal Medial Cortex                                                  | -0.165              | -0.129              | -0.265              | 0.061              |
| Left Frontal Operculum Cortex                                               | 0.173               | 0.168               | 0.063               | 0.029              |
| Left Frontal Orbital Cortex                                                 | 0.085               | 0.192               | 0.020               | 0.021              |
| Left Frontal Pole                                                           | 0.038               | -0.009              | -0.044              | -0.080             |
| Left Heschl's Gyrus (includes H1 and H2)                                    | -0.066              | -0.152              | -0.166              | 0.027              |
| Left Inferior Frontal Gyrus, pars opercularis                               | 0.039               | 0.041               | -0.039              | 0.177              |
| Left Inferior Frontal Gyrus, pars triangularis                              | 0.107               | 0.113               | 0.033               | 0.086              |
| Left Inferior Temporal Gyrus, anterior division                             | 0.111               | 0.153               | 0.088               | 0.278              |
| Left Inferior Temporal Gyrus, posterior division                            | 0.072               | 0.040               | -0.035              | 0.040              |
| Left Inferior Temporal Gyrus, temporooccipital part                         | 0.016               | 0.074               | 0.034               | -0.066             |
| Left Insular Cortex                                                         | 0.225               | 0.042               | -0.079              | 0.026              |
| Left Intracalcarine Cortex                                                  | 0.102               | 0.130               | 0.254               | 0.172              |
| Left Juxtapositional Lobule Cortex (formerly<br>Supplementary Motor Cortex) | -0.054              | -0.175              | -0.035              | -0.059             |
| Left Lateral Occipital Cortex, inferior division                            | 0.036               | -0.027              | -0.057              | -0.184             |
| Left Lateral Occipital Cortex, superior division                            | 0.130               | 0.033               | 0.013               | -0.083             |
| Left Lingual Gyrus                                                          | -0.181              | -0.101              | -0.044              | -0.130             |
| Left Middle Frontal Gyrus                                                   | 0.159               | 0.161               | -0.009              | -0.008             |
| Left Middle Temporal Gyrus, anterior division                               | -0.004              | 0.000               | -0.012              | 0.349              |
| Left Middle Temporal Gyrus, posterior division                              | -0.007              | -0.073              | -0.197              | 0.077              |
| Left Middle Temporal Gyrus, temporooccipital part                           | 0.042               | 0.203               | 0.128               | 0.015              |
| Left Occipital Fusiform Gyrus                                               | 0.105               | 0.118               | 0.088               | 0.086              |
| Left Occipital Pole                                                         | -0.212              | -0.082              | 0.070               | -0.203             |
| Left Paracingulate Gyrus                                                    | -0.109              | -0.024              | -0.042              | 0.065              |
| Left Parahippocampal Gyrus, anterior division                               | 0.048               | 0.086               | -0.069              | -0.146             |
| Left Parahippocampal Gyrus, posterior division                              | -0.012              | 0.058               | 0.062               | -0.116             |
| Left Parietal Operculum Cortex                                              | 0.151               | -0.030              | -0.036              | -0.101             |
| Left Planum Polare                                                          | 0.041               | 0.075               | -0.010              | 0.219              |
| Left Planum Temporale                                                       | 0.139               | 0.000               | -0.060              | 0.079              |
| Left Postcentral Gyrus                                                      | -0.015              | -0.118              | -0.082              | -0.060             |
| Left Precentral Gyrus                                                       | -0.131              | -0.007              | -0.045              | -0.060             |
| Left Precuneous Cortex                                                      | 0.059               | 0.007               | -0.004              | -0.101             |
| Left Subcallosal Cortex                                                     | -0.065              | -0.078              | -0.140              | -0.002             |

|                                                                           |        |        |        |        |
|---------------------------------------------------------------------------|--------|--------|--------|--------|
| Left Superior Frontal Gyrus                                               | -0.020 | -0.126 | -0.050 | 0.026  |
| Left Superior Parietal Lobule                                             | -0.075 | -0.023 | 0.028  | -0.054 |
| Left Superior Temporal Gyrus, anterior division                           | 0.052  | 0.140  | -0.072 | 0.148  |
| Left Superior Temporal Gyrus, posterior division                          | -0.150 | 0.047  | 0.002  | -0.093 |
| Left Supracalcarine Cortex                                                | -0.004 | -0.077 | 0.181  | -0.093 |
| Left Supramarginal Gyrus, anterior division                               | 0.029  | 0.005  | -0.033 | 0.114  |
| Left Supramarginal Gyrus, posterior division                              | 0.167  | 0.100  | 0.090  | -0.027 |
| Left Temporal Fusiform Cortex, anterior division                          | 0.045  | 0.076  | -0.059 | 0.062  |
| Left Temporal Fusiform Cortex, posterior division                         | -0.052 | 0.124  | 0.069  | 0.182  |
| Left Temporal Occipital Fusiform Cortex                                   | 0.089  | -0.049 | -0.054 | -0.100 |
| Left Temporal Pole                                                        | 0.015  | 0.073  | 0.025  | 0.187  |
| Right Angular Gyrus                                                       | -0.015 | -0.032 | 0.063  | -0.074 |
| Right Central Opercular Cortex                                            | -0.120 | -0.020 | -0.063 | -0.070 |
| Right Cingulate Gyrus, anterior division                                  | 0.027  | 0.176  | 0.038  | 0.036  |
| Right Cingulate Gyrus, posterior division                                 | 0.092  | -0.058 | 0.051  | -0.256 |
| Right Cuneal Cortex                                                       | -0.111 | -0.174 | 0.015  | -0.224 |
| Right Frontal Medial Cortex                                               | -0.119 | -0.072 | -0.060 | -0.011 |
| Right Frontal Operculum Cortex                                            | -0.032 | -0.015 | -0.019 | -0.056 |
| Right Frontal Orbital Cortex                                              | -0.018 | -0.040 | -0.104 | 0.076  |
| Right Frontal Pole                                                        | -0.018 | -0.050 | -0.095 | 0.058  |
| Right Heschl's Gyrus (includes H1 and H2)                                 | -0.025 | -0.084 | -0.079 | -0.138 |
| Right Inferior Frontal Gyrus, pars opercularis                            | -0.102 | -0.050 | -0.156 | -0.094 |
| Right Inferior Frontal Gyrus, pars triangularis                           | -0.215 | -0.062 | -0.185 | -0.128 |
| Right Inferior Temporal Gyrus, anterior division                          | 0.038  | -0.076 | -0.097 | -0.180 |
| Right Inferior Temporal Gyrus, posterior division                         | 0.069  | -0.002 | -0.071 | -0.128 |
| Right Inferior Temporal Gyrus, temporooccipital part                      | -0.153 | -0.115 | -0.171 | -0.217 |
| Right Insular Cortex                                                      | -0.035 | 0.031  | -0.006 | -0.068 |
| Right Intracalcarine Cortex                                               | -0.078 | -0.140 | -0.117 | -0.088 |
| Right Juxtapositional Lobule Cortex (formerly Supplementary Motor Cortex) | -0.013 | -0.167 | -0.114 | -0.135 |
| Right Lateral Occipital Cortex, inferior division                         | -0.055 | -0.088 | 0.125  | 0.008  |
| Right Lateral Occipital Cortex, superior division                         | -0.035 | -0.078 | 0.043  | -0.119 |
| Right Lingual Gyrus                                                       | -0.180 | -0.115 | -0.096 | -0.149 |
| Right Middle Frontal Gyrus                                                | 0.117  | 0.014  | 0.102  | 0.055  |
| Right Middle Temporal Gyrus, anterior division                            | -0.130 | -0.068 | -0.120 | -0.126 |
| Right Middle Temporal Gyrus, posterior division                           | -0.030 | -0.033 | -0.008 | 0.045  |
| Right Middle Temporal Gyrus, temporooccipital part                        | -0.008 | -0.071 | 0.010  | -0.109 |
| Right Occipital Fusiform Gyrus                                            | 0.115  | 0.249  | 0.163  | 0.237  |
| Right Occipital Pole                                                      | -0.053 | -0.067 | 0.074  | -0.006 |
| Right Paracingulate Gyrus                                                 | -0.062 | 0.123  | 0.042  | -0.085 |
| Right Parahippocampal Gyrus, anterior division                            | -0.093 | -0.061 | -0.033 | -0.109 |
| Right Parahippocampal Gyrus, posterior division                           | -0.105 | -0.118 | -0.103 | -0.137 |

|                                                    |        |        |        |        |
|----------------------------------------------------|--------|--------|--------|--------|
| Right Parietal Operculum Cortex                    | 0.105  | -0.050 | -0.019 | -0.072 |
| Right Planum Polare                                | -0.033 | 0.050  | -0.042 | -0.148 |
| Right Planum Temporale                             | -0.064 | -0.135 | -0.057 | -0.209 |
| Right Postcentral Gyrus                            | -0.071 | 0.014  | 0.047  | 0.051  |
| Right Precentral Gyrus                             | 0.031  | 0.027  | -0.039 | -0.175 |
| Right Precuneous Cortex                            | 0.077  | 0.071  | 0.010  | -0.035 |
| Right Subcallosal Cortex                           | 0.018  | 0.044  | -0.007 | -0.106 |
| Right Superior Frontal Gyrus                       | -0.159 | -0.162 | -0.149 | -0.156 |
| Right Superior Parietal Lobule                     | -0.007 | 0.035  | -0.001 | -0.063 |
| Right Superior Temporal Gyrus, anterior division   | -0.155 | -0.045 | -0.124 | -0.175 |
| Right Superior Temporal Gyrus, posterior division  | -0.133 | -0.052 | -0.127 | -0.081 |
| Right Supracalcarine Cortex                        | -0.131 | -0.153 | 0.138  | -0.174 |
| Right Supramarginal Gyrus, anterior division       | -0.101 | -0.061 | -0.078 | -0.068 |
| Right Supramarginal Gyrus, posterior division      | -0.149 | -0.079 | -0.022 | -0.222 |
| Right Temporal Fusiform Cortex, anterior division  | -0.005 | 0.064  | -0.020 | -0.041 |
| Right Temporal Fusiform Cortex, posterior division | -0.095 | -0.036 | 0.030  | -0.137 |
| Right Temporal Occipital Fusiform Cortex           | -0.124 | -0.080 | 0.002  | -0.073 |
| Right Temporal Pole                                | -0.181 | -0.112 | -0.230 | -0.284 |

---

\* $p_{FDR} < 0.05$ ; \*\* $p_{FDR}$
